# Supplementary material for: Effective Singlet Oxygen Sensitizers Based on the Phenazine Skeleton as Efficient Light Absorbers in Dye Photoinitiating Systems for Radical Polymerization of Acrylates
Source: MDPI journal article supplement (doi:10.3390/ma14113085), 2021-06-04
Supplement: s1 [file s1]

# Electronic Supplementary Information

## Effective singlet oxygen sensitizers based on phenazine skeleton as efficient light absorbers in dye photoinitiating systems for radical polymerization of acrylates

Ilona Pyszka <sup>1,\*</sup>, Zdzisław Kucybała <sup>1</sup> and Beata Jędrzejewska <sup>1,\*</sup>

<sup>1</sup>*UTP University of Science and Technology, Faculty of Chemical Technology and Engineering  
Seminarnyjna 3, 85-326 Bydgoszcz, Poland*

*\*Corresponding authors:*

*I. Pyszka: e-mail address: Ilona.Pyszka@utp.edu.pl; Tel.: +48-52-374-9039 (IP)*

*B. Jędrzejewska: e-mail address: beata@utp.edu.pl; Tel.: +48-52-374-9046 (BJ)*

| <b>Table of contents</b>                                                                                                                                                                       | <b>page</b> |
|------------------------------------------------------------------------------------------------------------------------------------------------------------------------------------------------|-------------|
| <sup>1</sup> H and <sup>13</sup> C NMR spectra                                                                                                                                                 | 2-24        |
| Absorption spectra in ethyl acetate – Figure S1                                                                                                                                                | 25-26       |
| Fluorescence spectra in ethyl acetate – Figure S2                                                                                                                                              | 27-28       |
| <sup>1</sup> H NMR spectra of a mixture of dibenzo[a.c]phenazine <b>FN2</b> (sensitizer) and 2,3-diphenyl- <i>p</i> -dioxene in CDCl <sub>3</sub> after different irradiation time – Figure S3 | 29-33       |

# <sup>1</sup>H spectrum of FN1

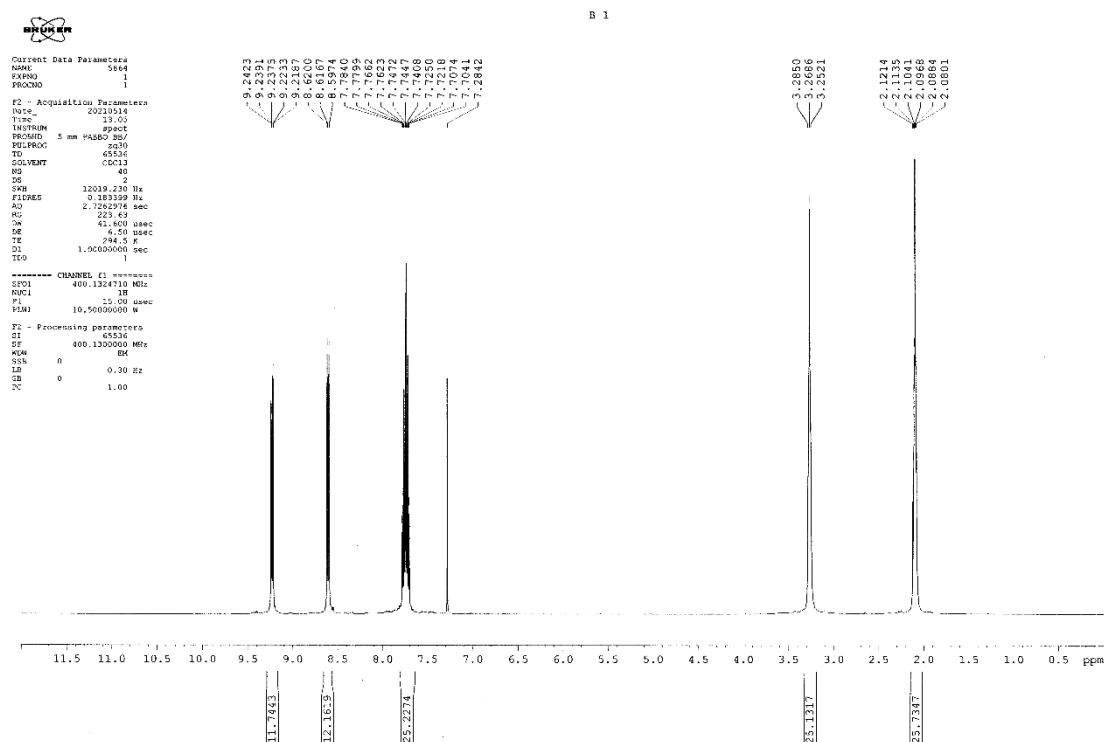

# <sup>13</sup>C spectrum of FN1

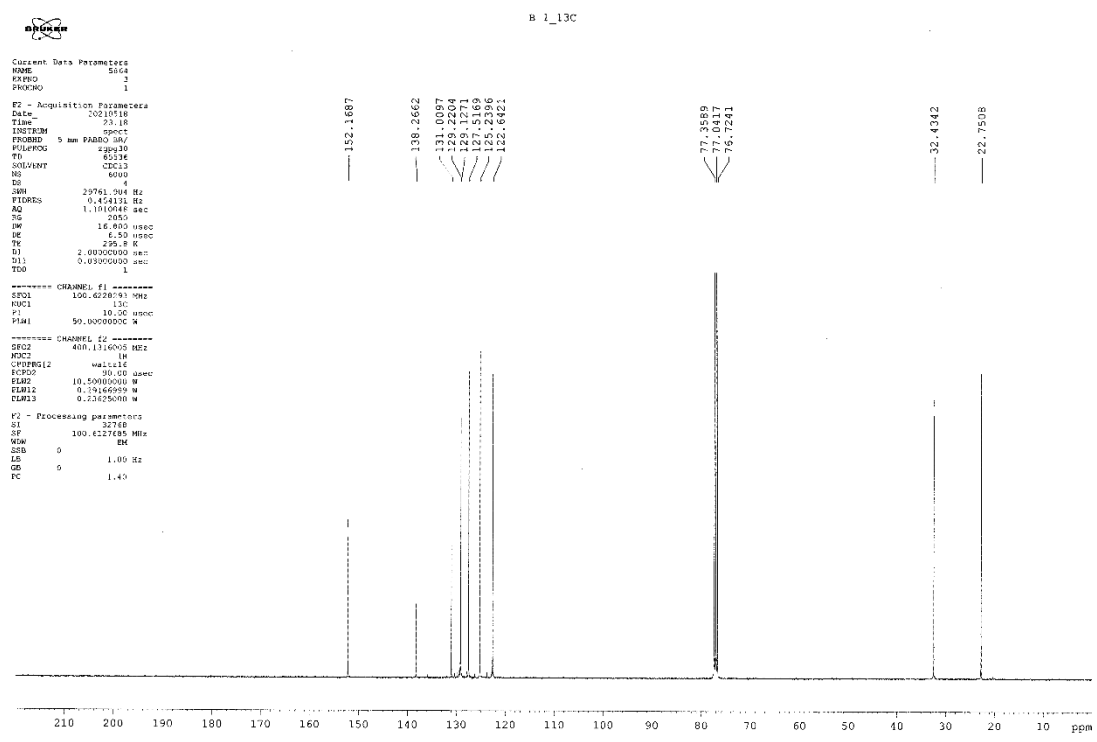

Enlarged spectrum in the range of 120-160 ppm.

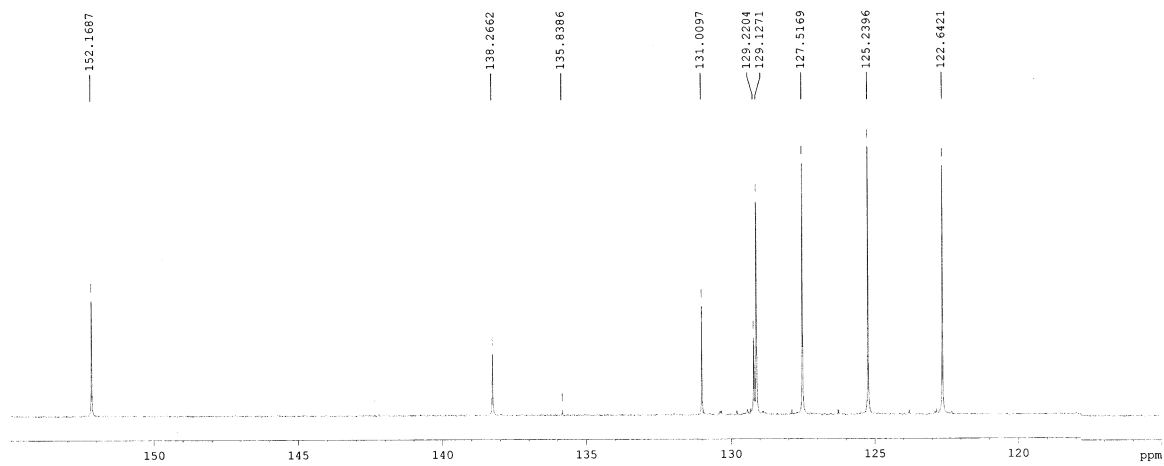

# <sup>1</sup>H spectrum of FN2

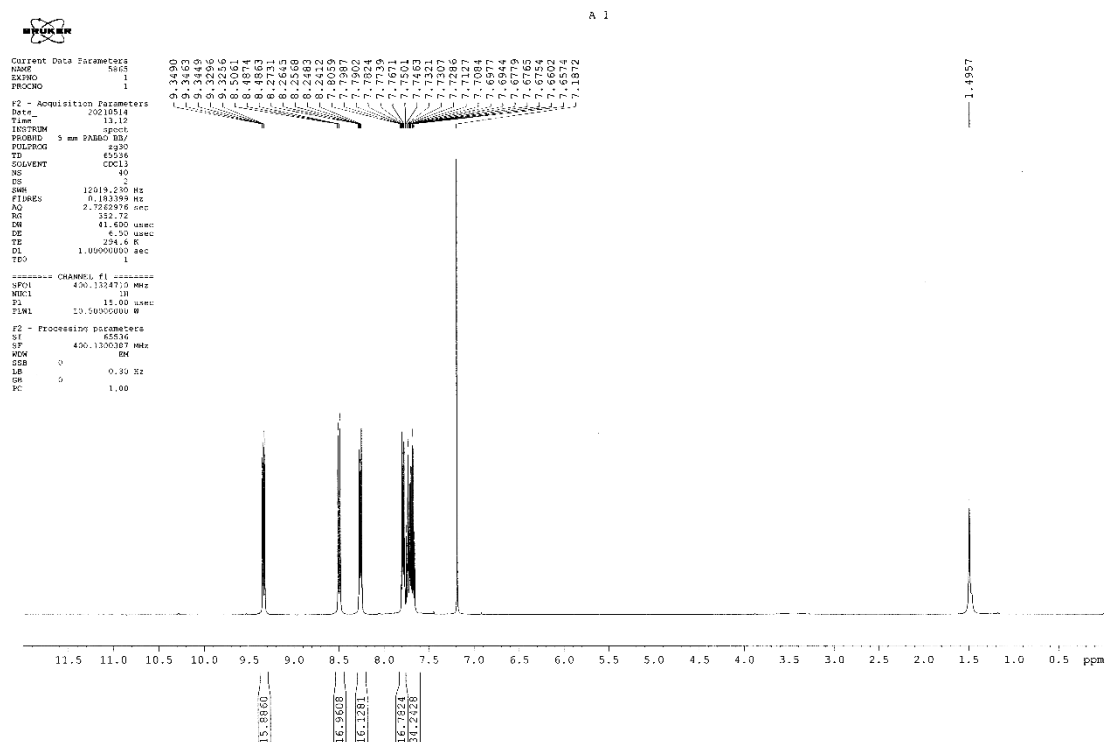

Enlarged spectrum in the range of 6-9 ppm.

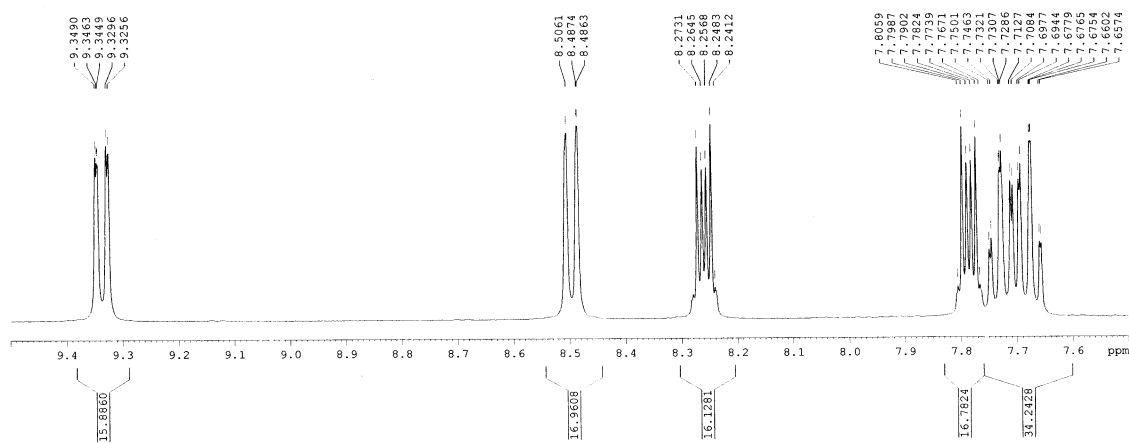

# <sup>13</sup>C spectrum of FN2

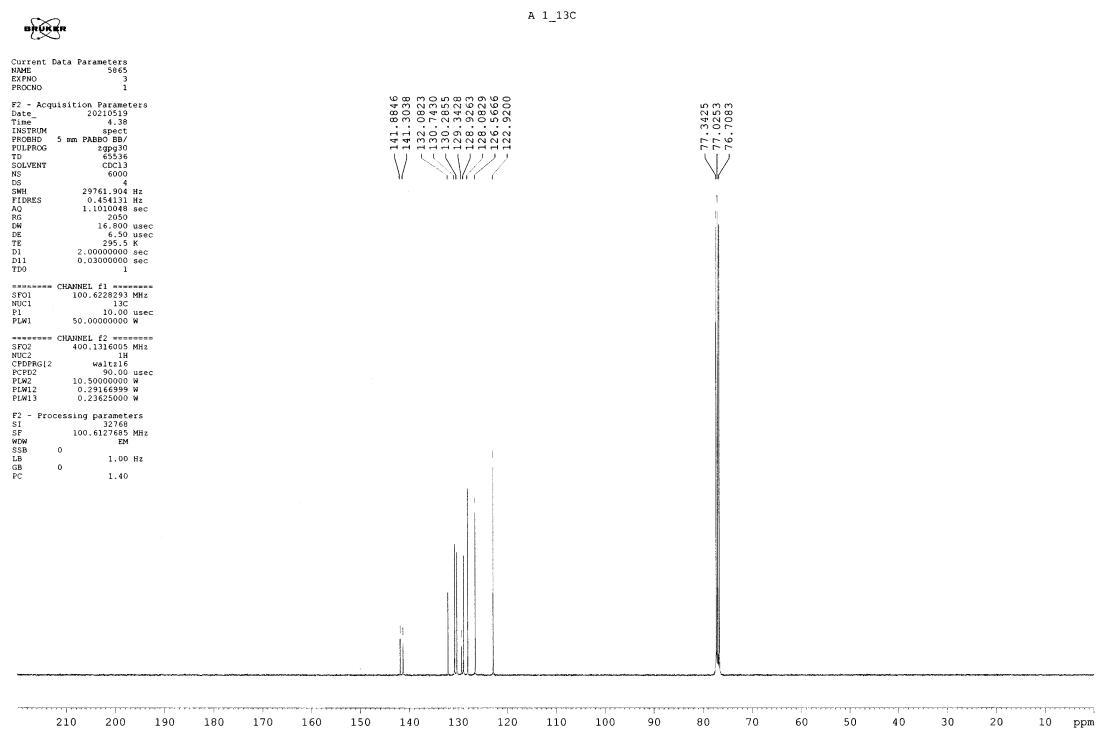

Enlarged spectrum in the range of 110-150 ppm.

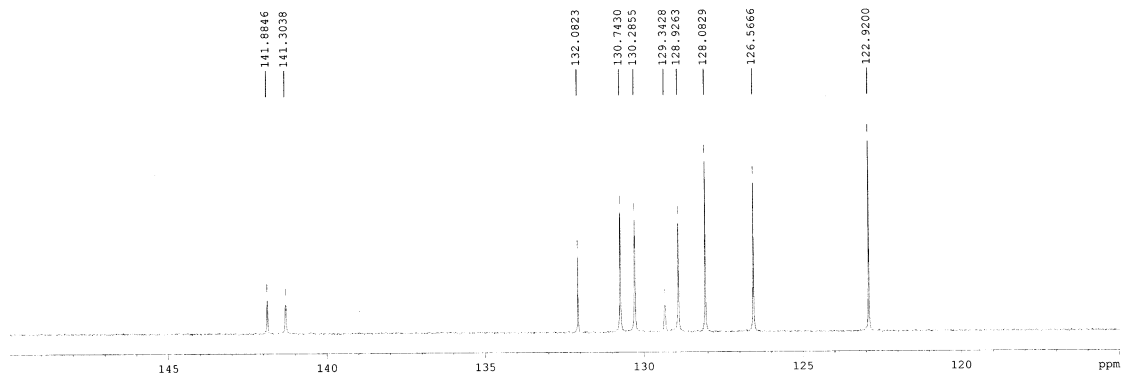

# <sup>1</sup>H spectrum of FN3

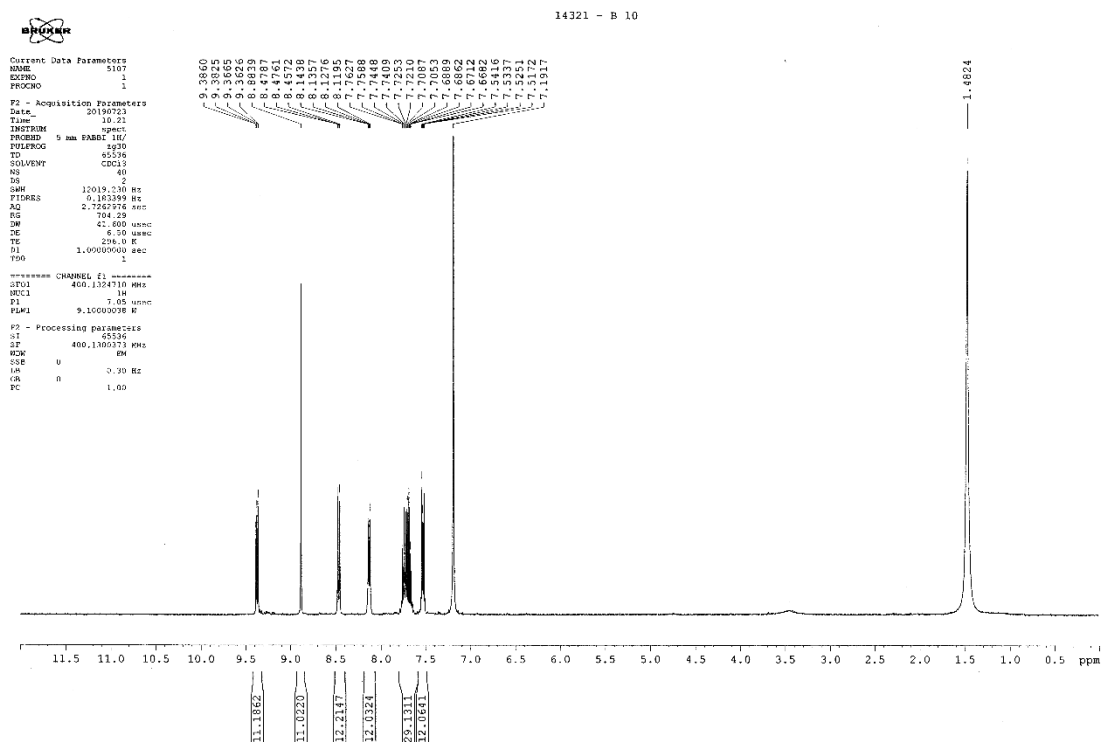

Enlarged spectrum in the range of 6-9 ppm.

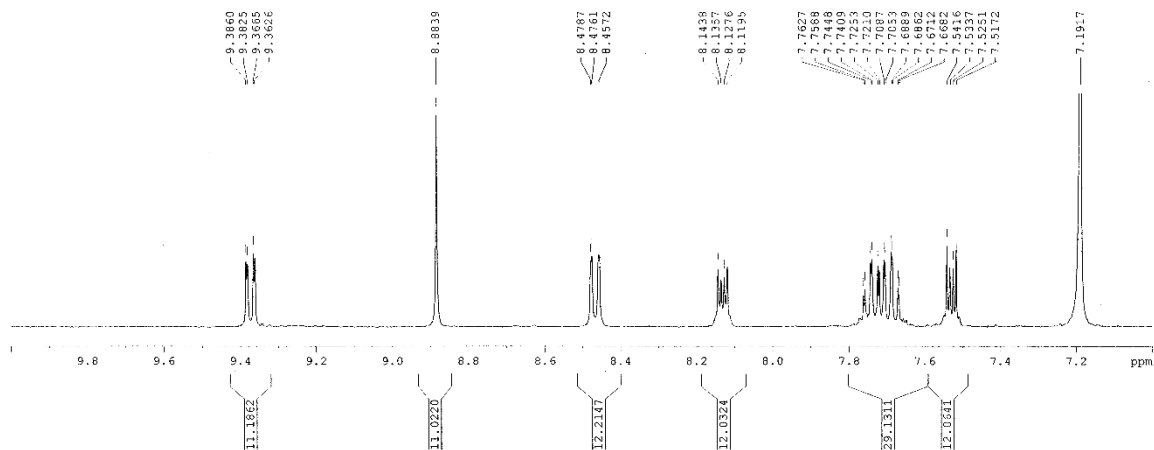

# <sup>1</sup>H spectrum of FN4

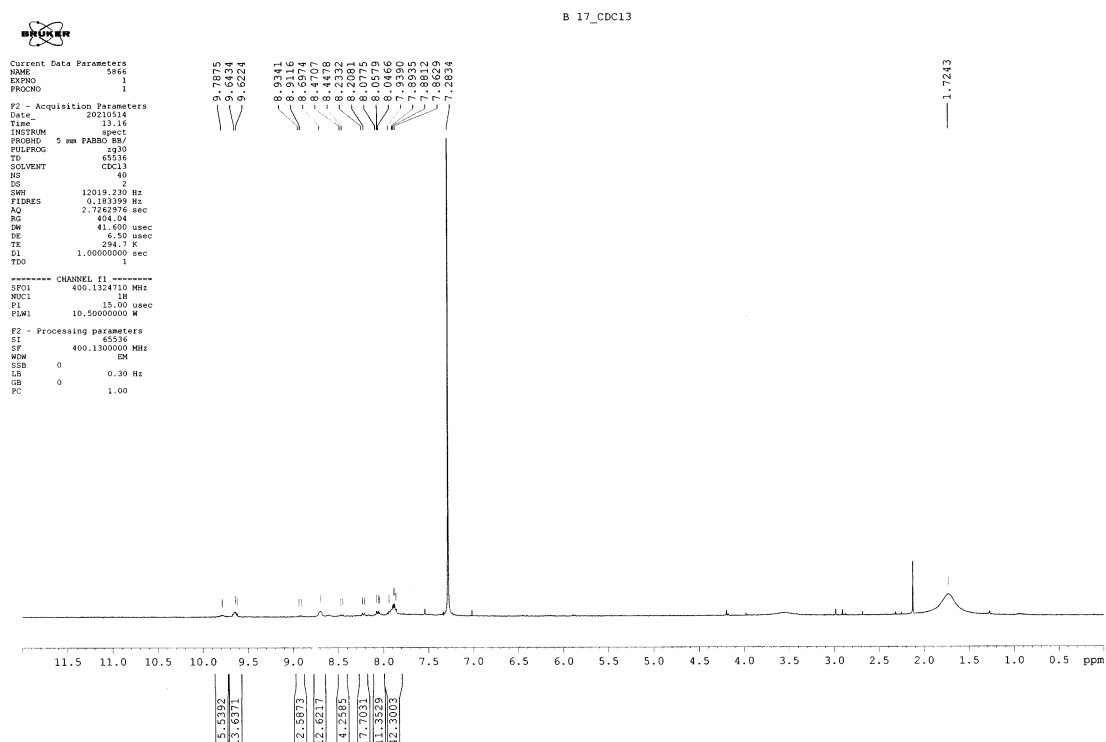

Enlarged spectrum in the range of 6-9 ppm.

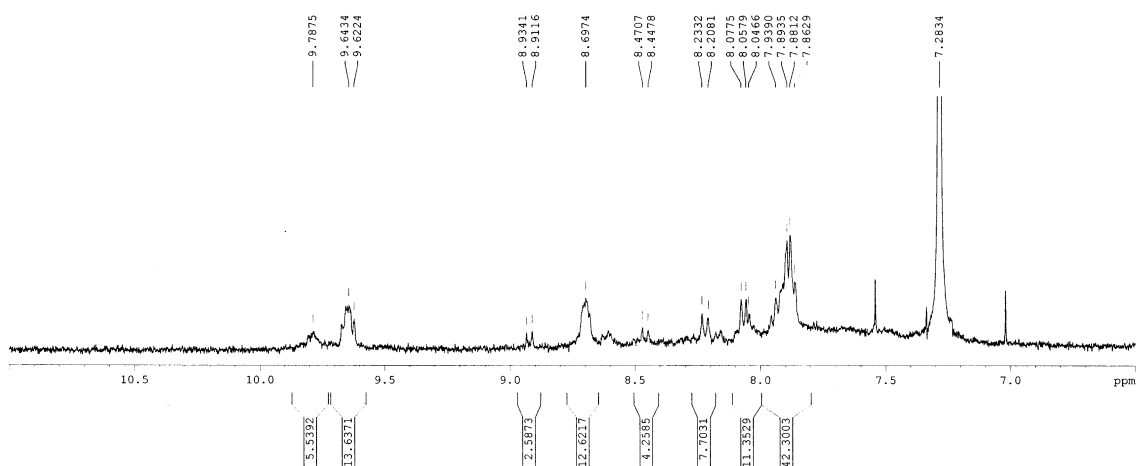

# <sup>1</sup>H spectrum of FN5

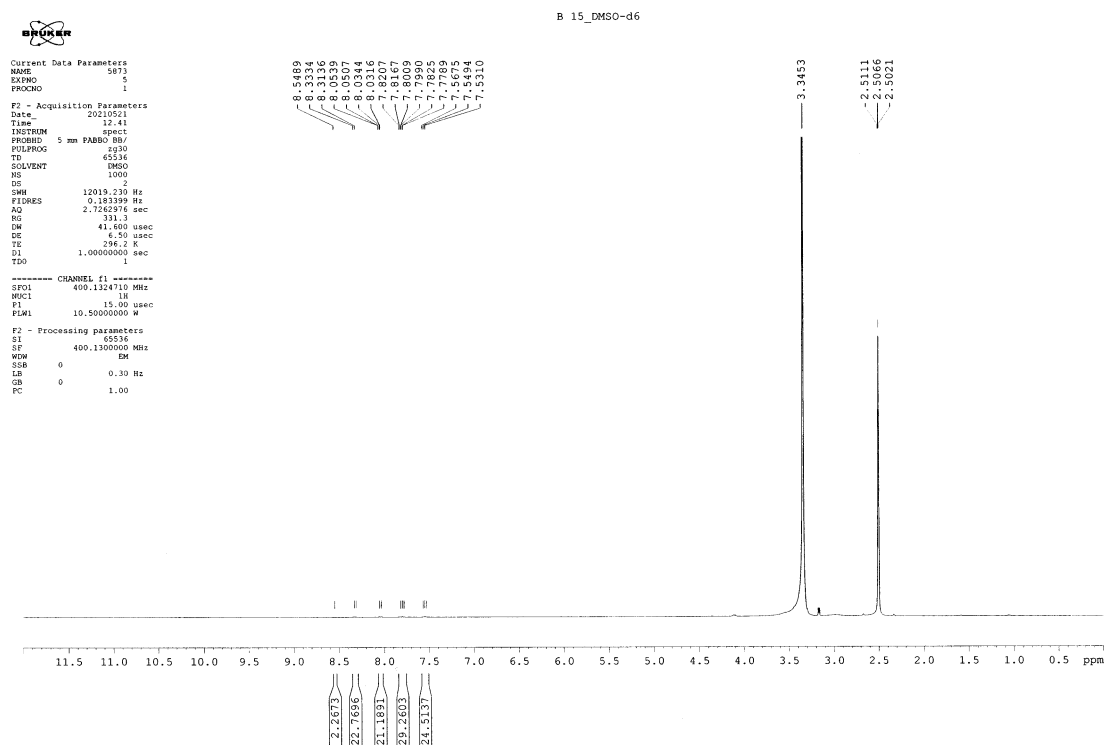

Enlarged spectrum in the range of 6-9 ppm.

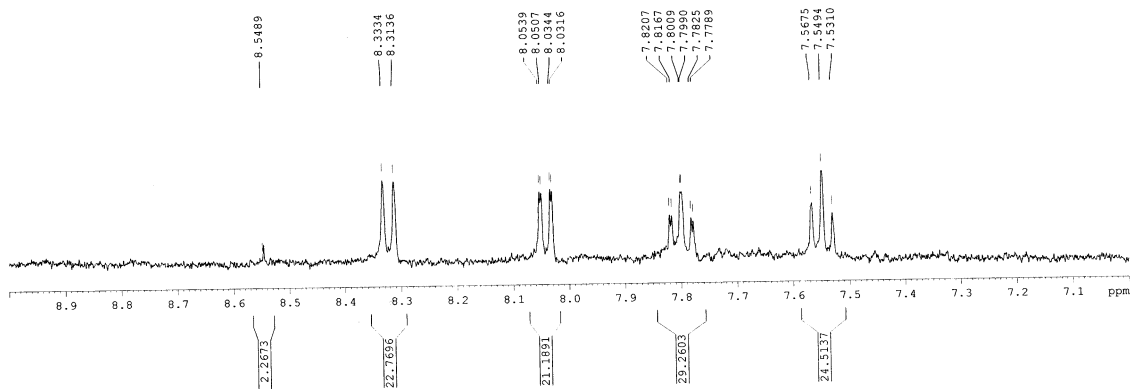



# <sup>1</sup>H spectrum of FN6

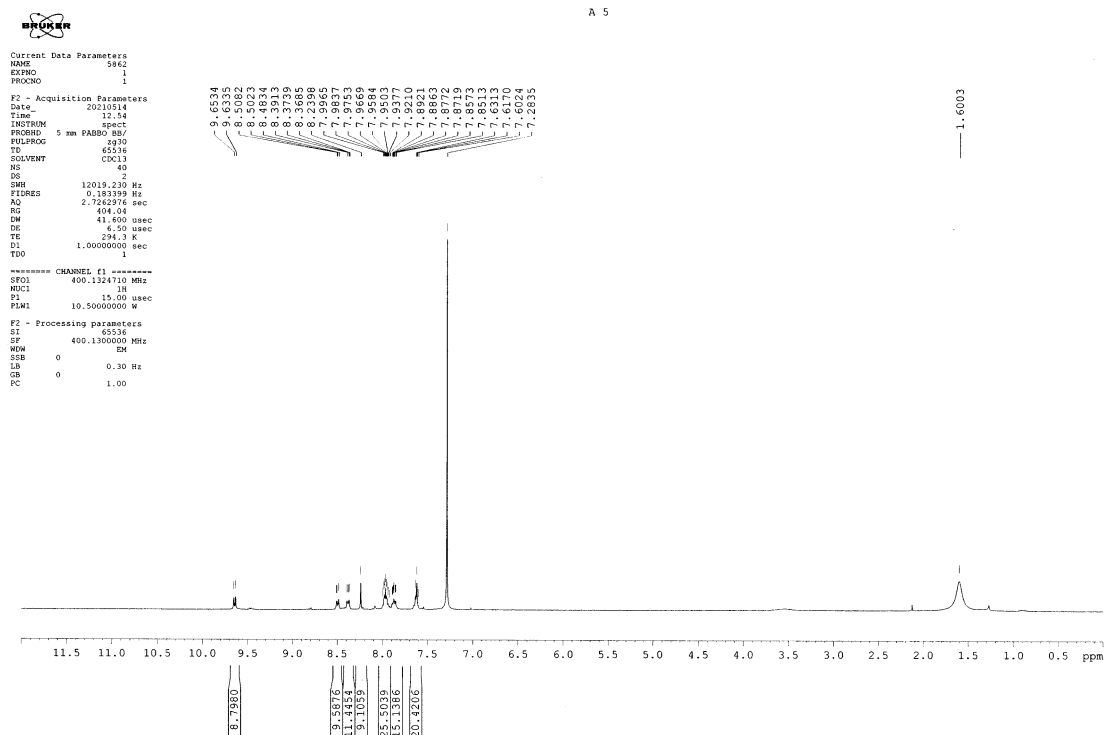

Enlarged spectrum in the range of 6-9 ppm.

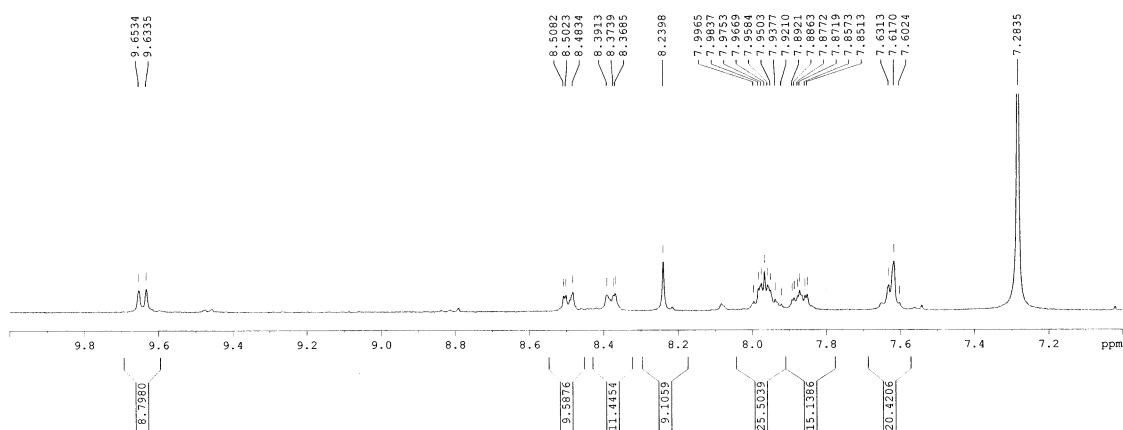

# <sup>13</sup>C spectrum of FN6

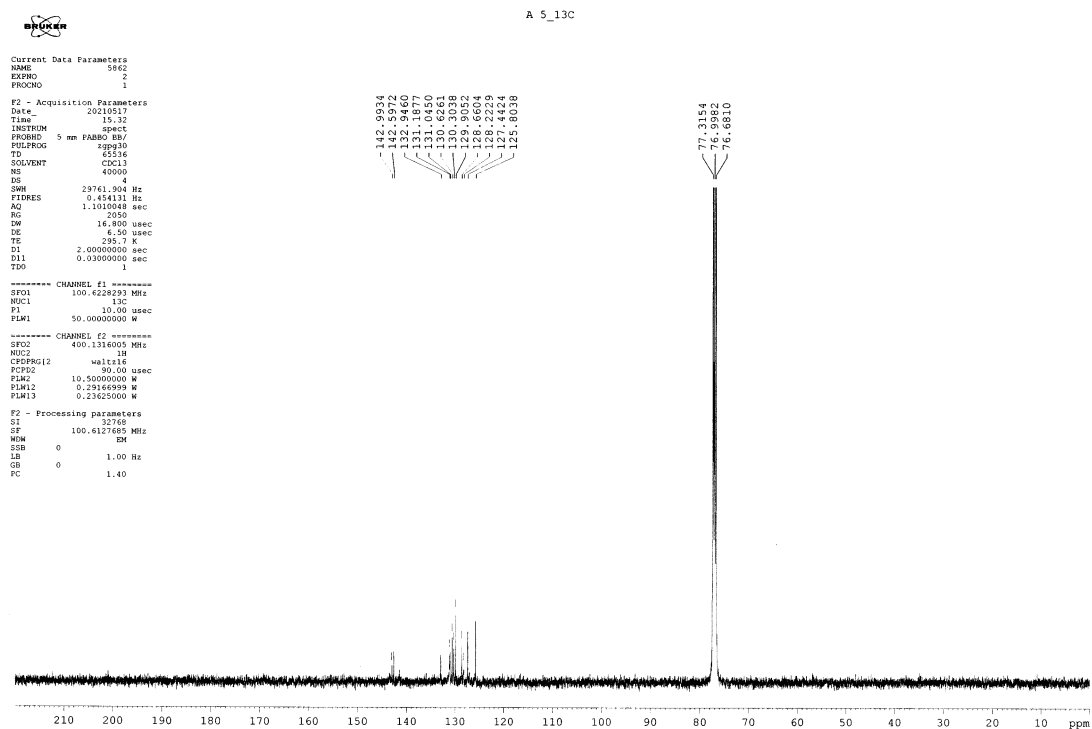

Enlarged spectrum in the range of 110-160 ppm.

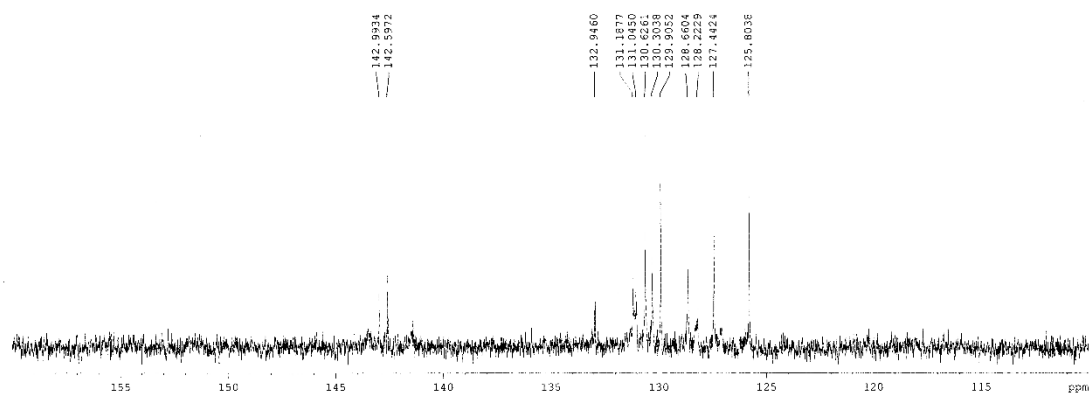

# <sup>1</sup>H spectrum of FN7

B 11

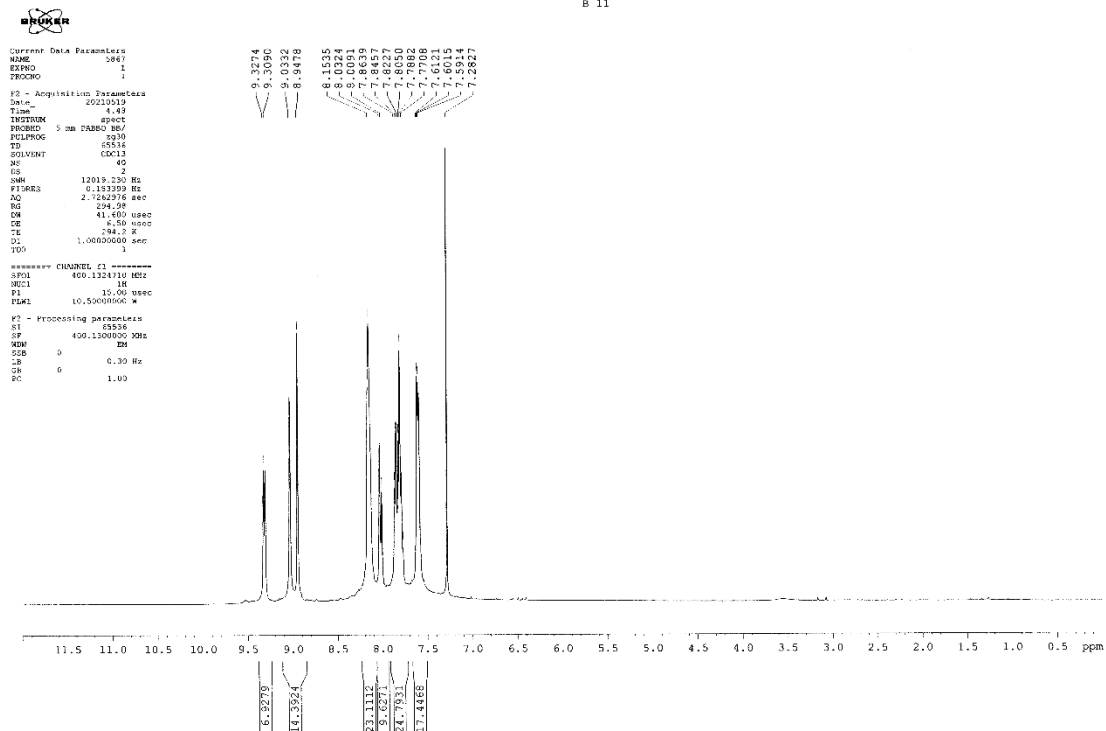

Enlarged spectrum in the range of 6-9 ppm.

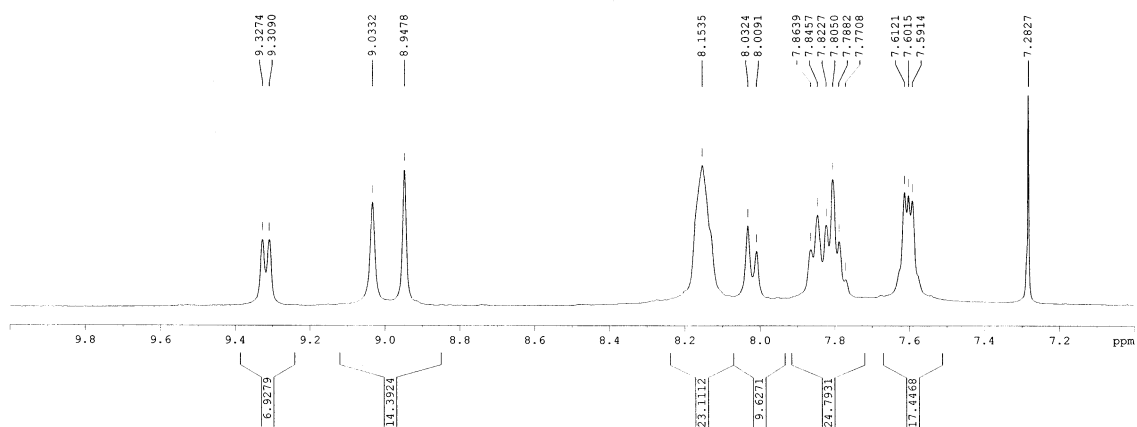

# $^{13}\text{C}$ spectrum of FN7

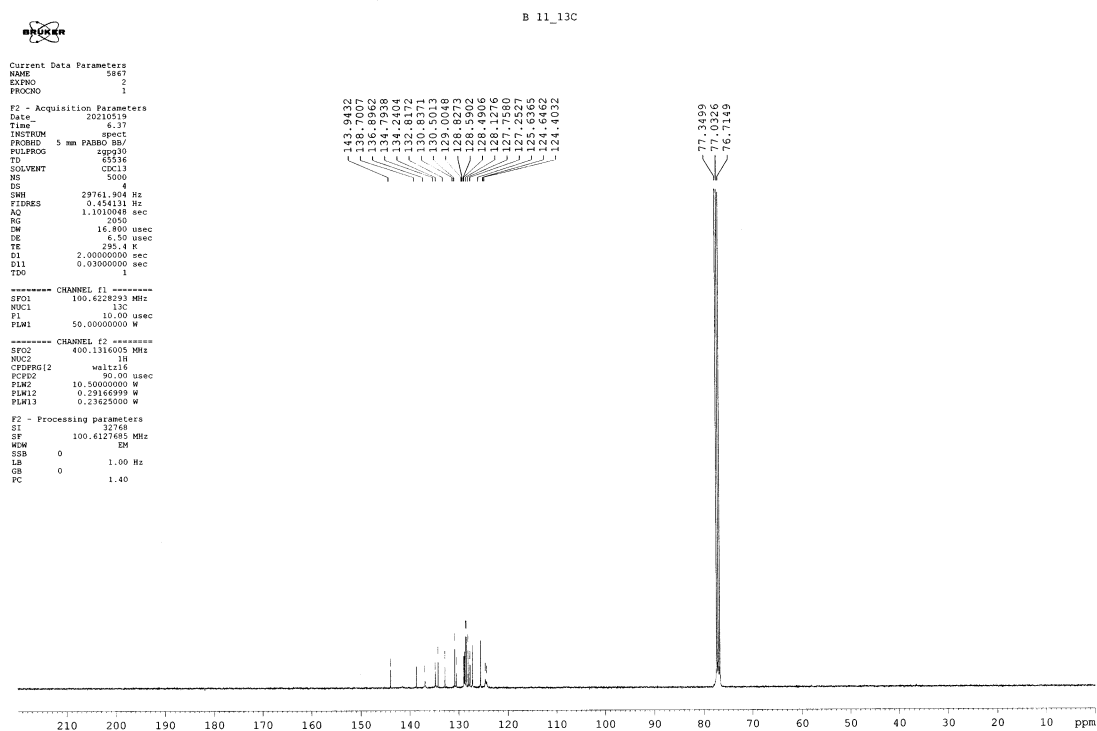

Enlarged spectrum in the range of 110-160 ppm.

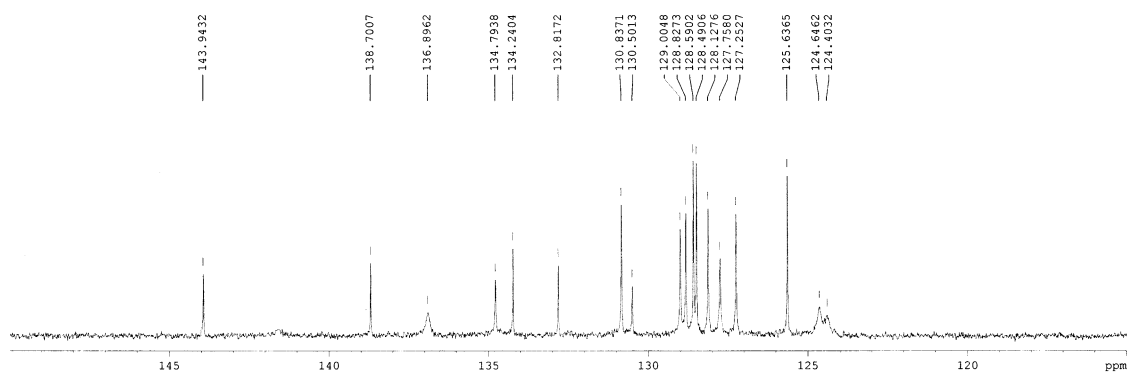

# <sup>1</sup>H spectrum of FN8

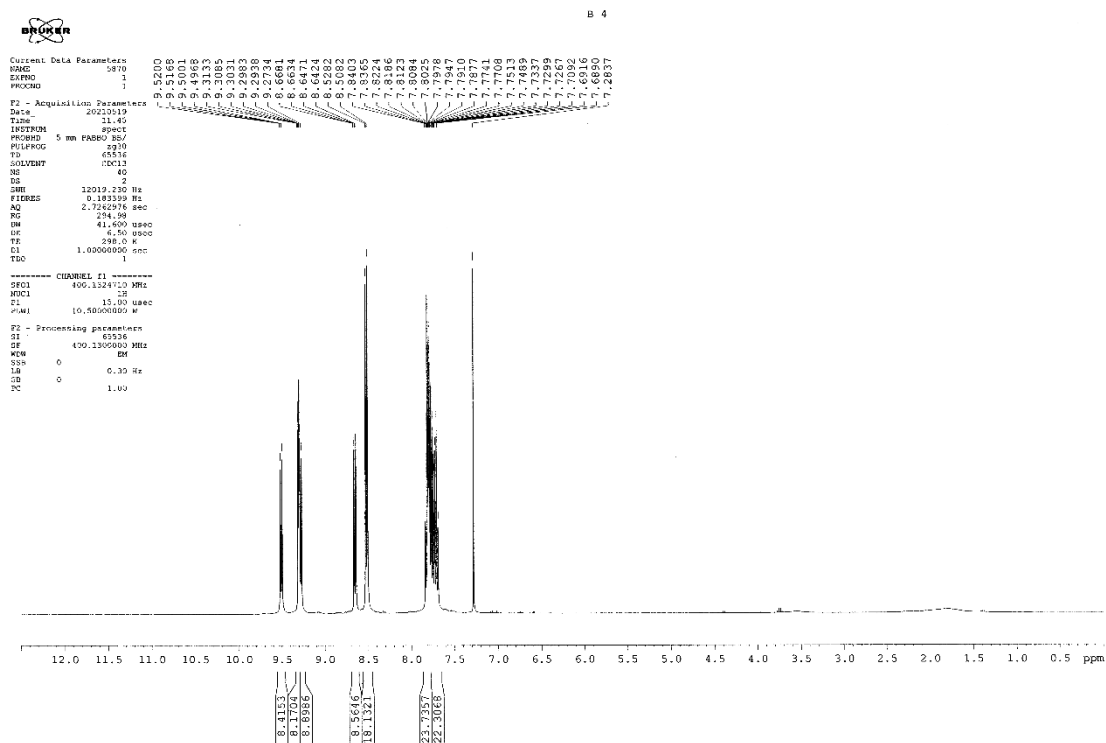

# <sup>13</sup>C spectrum of FN8

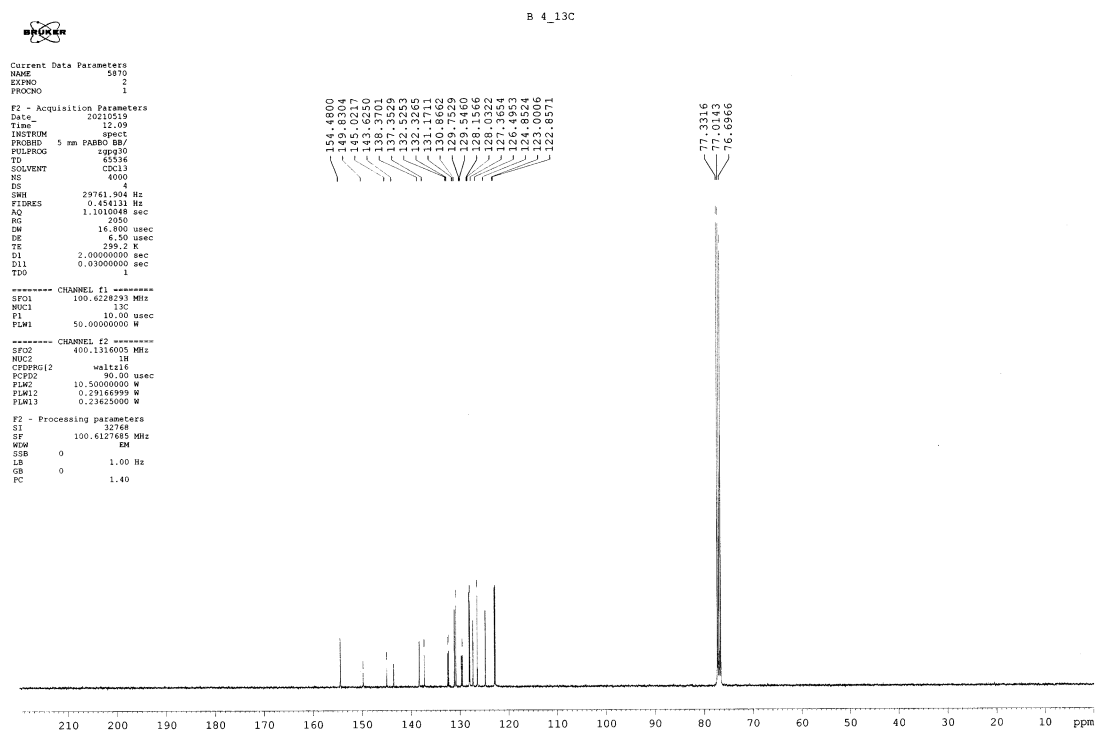

Enlarged spectrum in the range of 110-150 ppm.

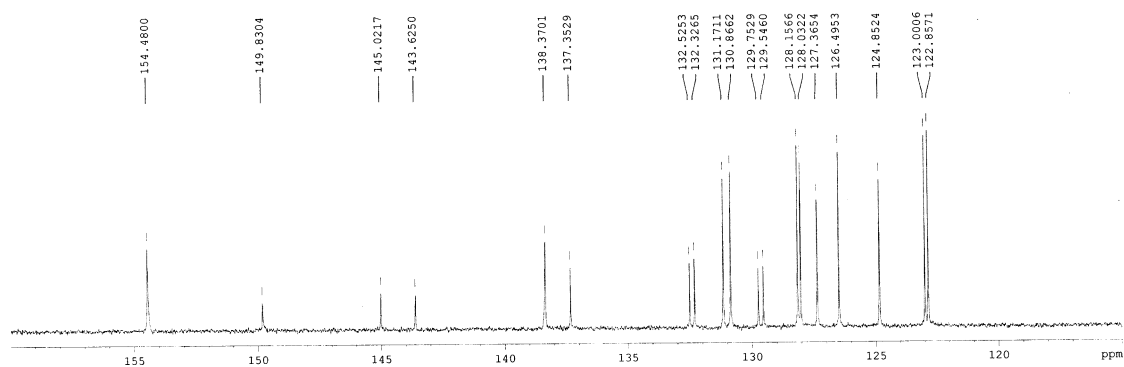

# <sup>1</sup>H spectrum of FN9

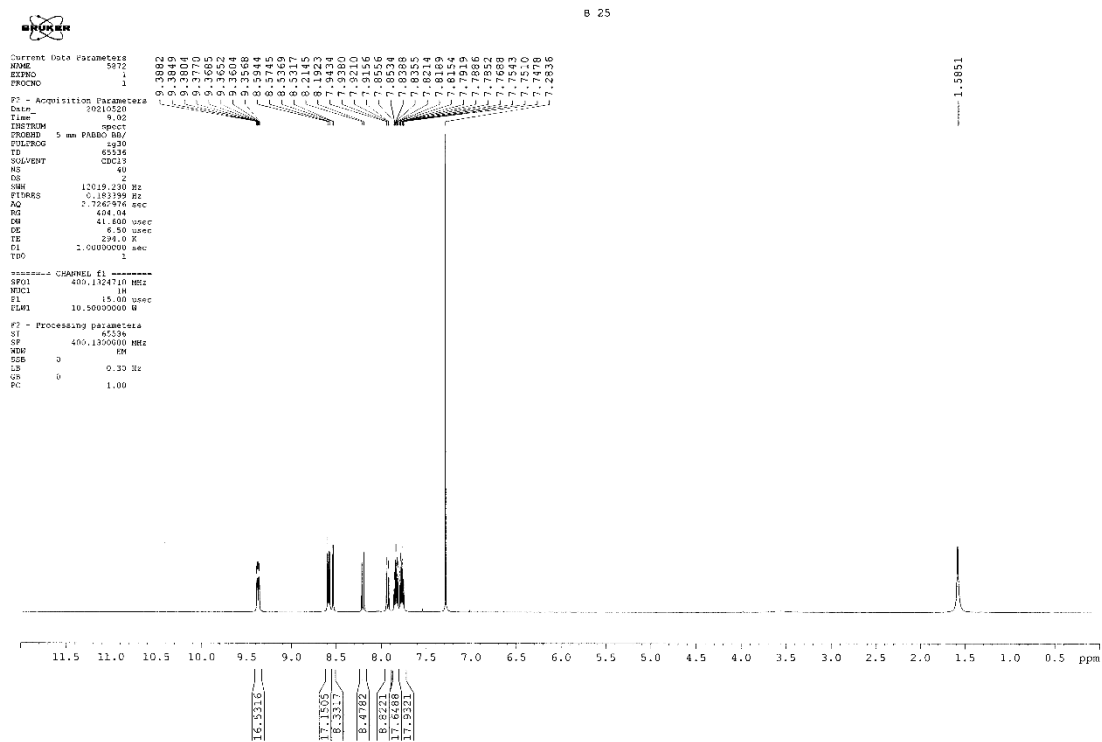

# <sup>13</sup>C spectrum of FN9

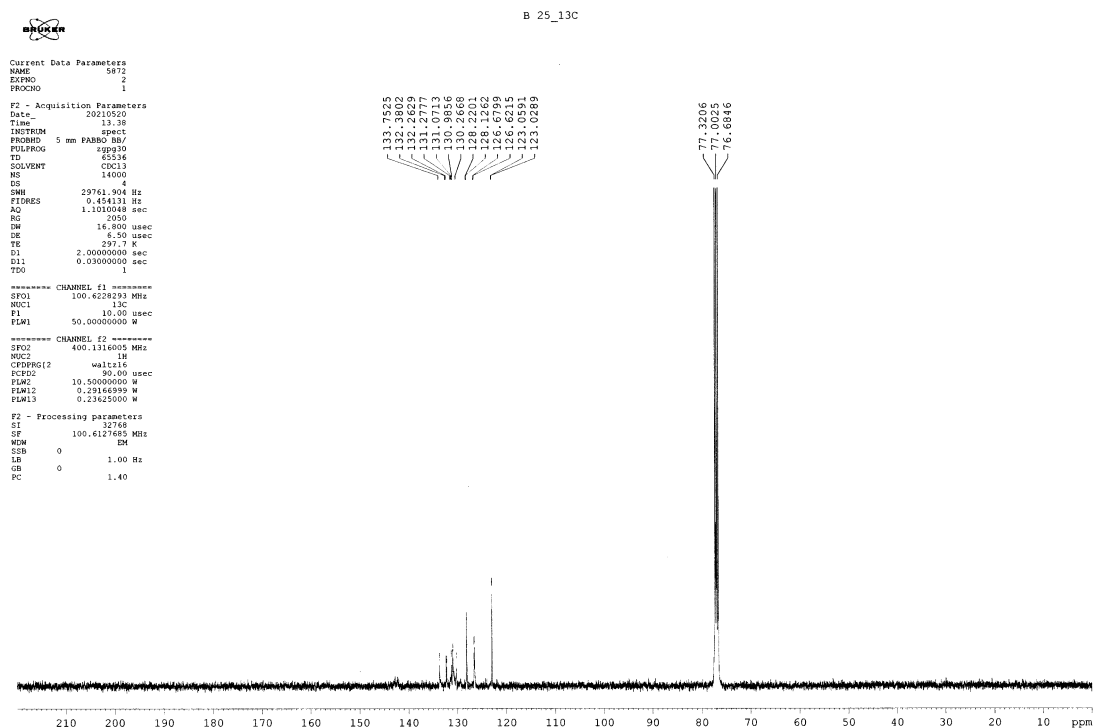

Enlarged spectrum in the range of 110-150 ppm.

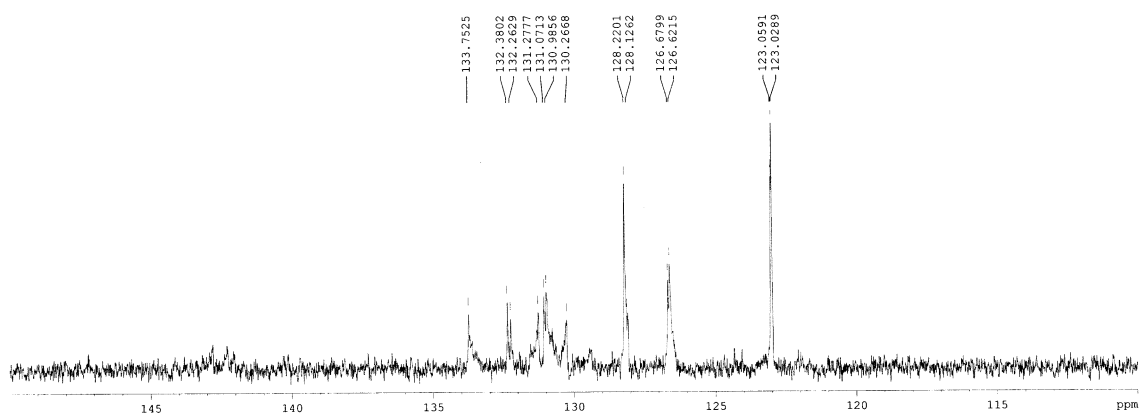



# <sup>1</sup>H spectrum of FN10

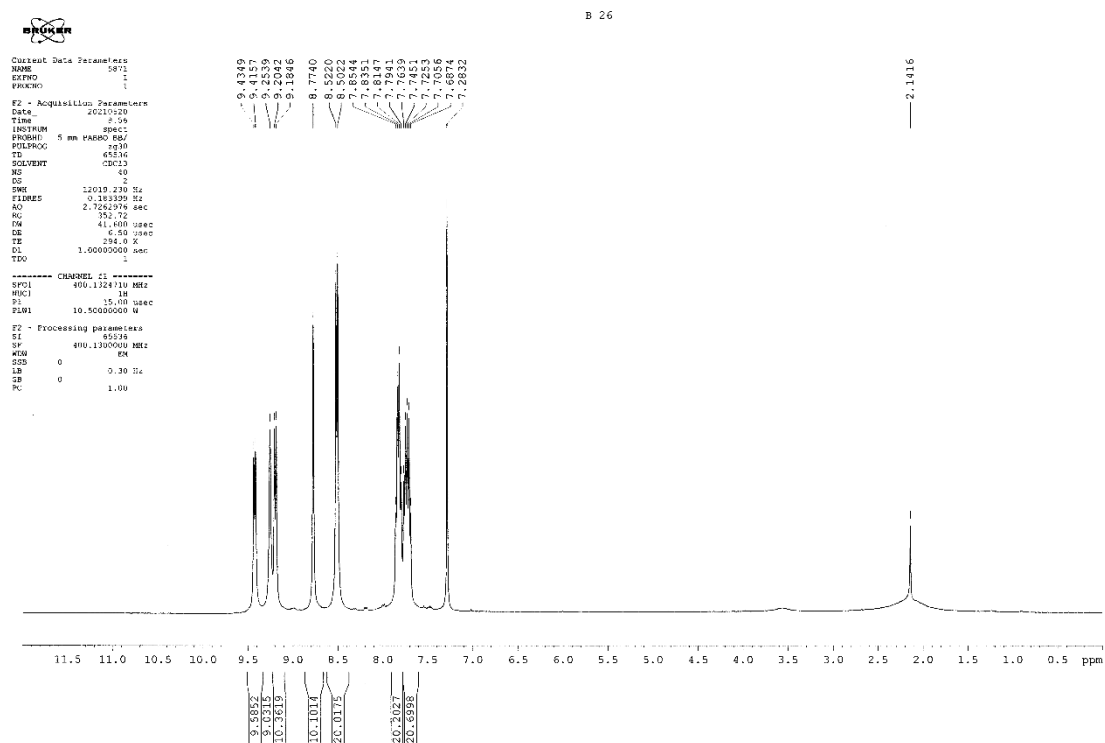

Enlarged spectrum in the range of 6-9 ppm.

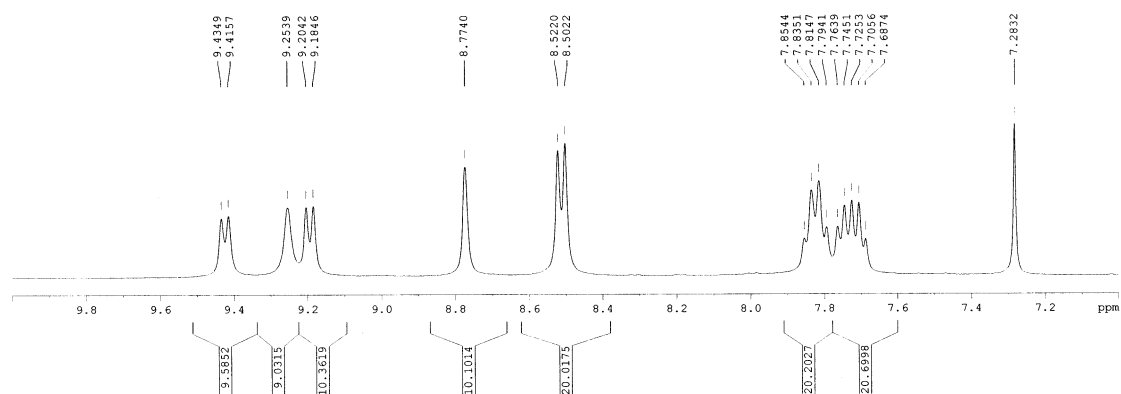

# <sup>13</sup>C spectrum of FN10

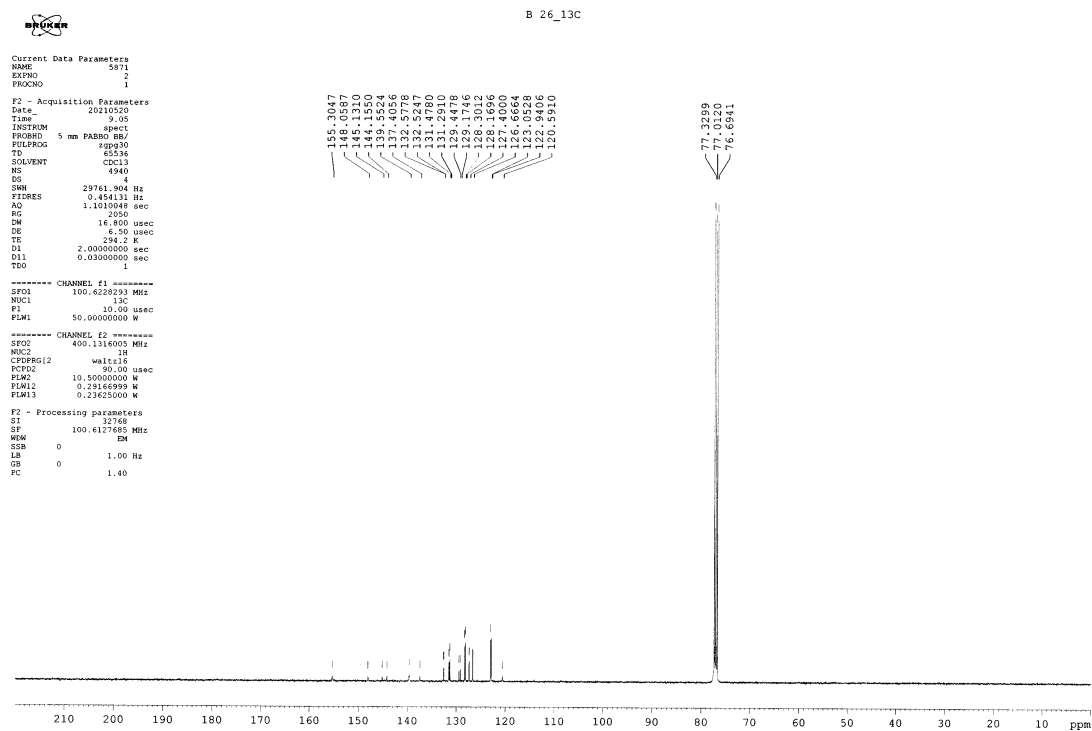

Enlarged spectrum in the range of 110-150 ppm.

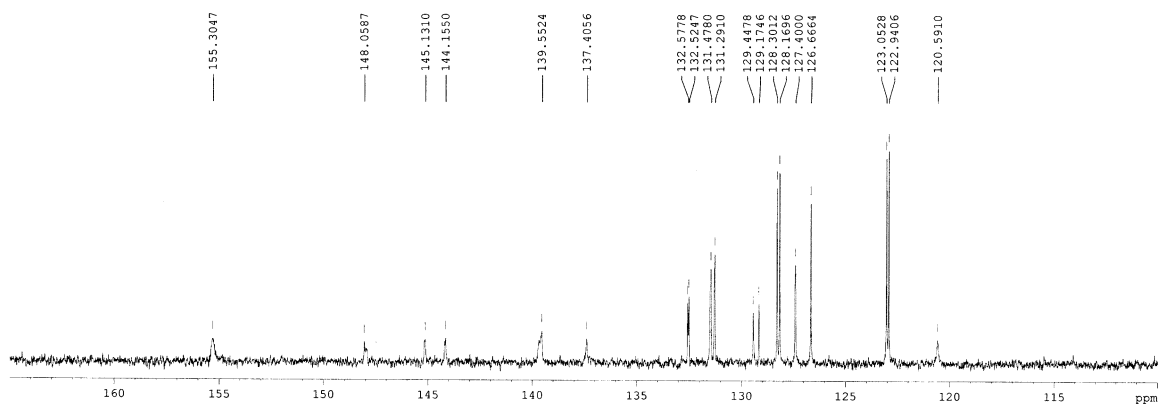

# <sup>1</sup>H spectrum of FN11

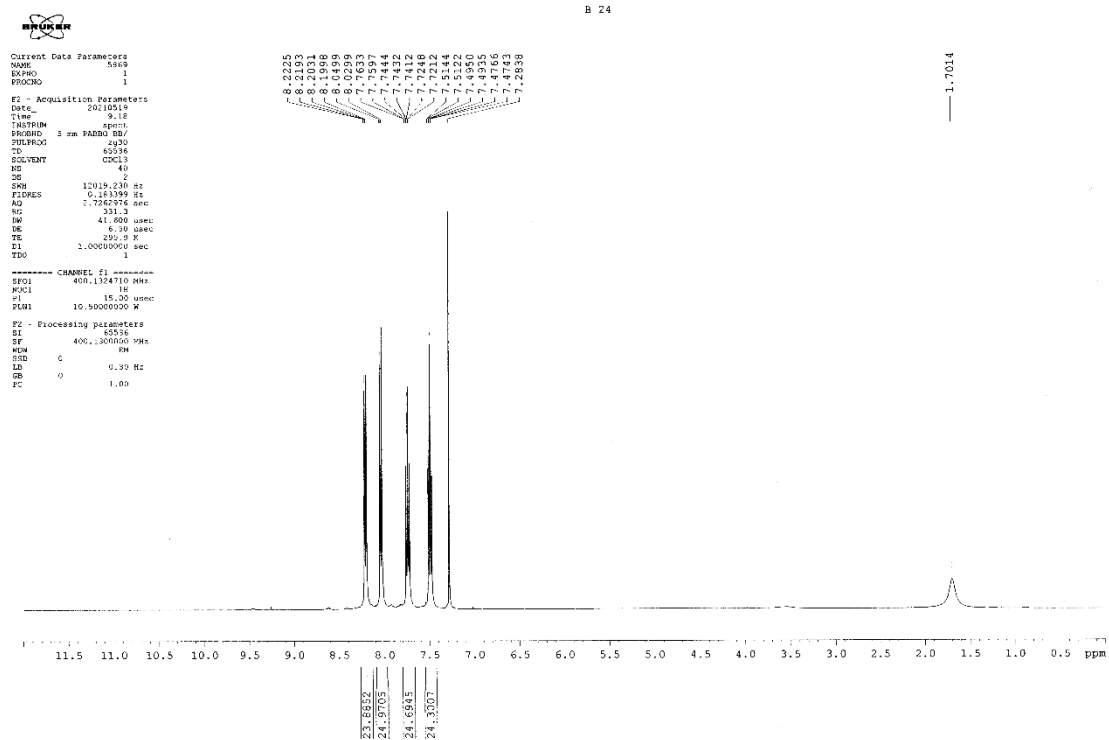

Enlarged spectrum in the range of 6-9 ppm.

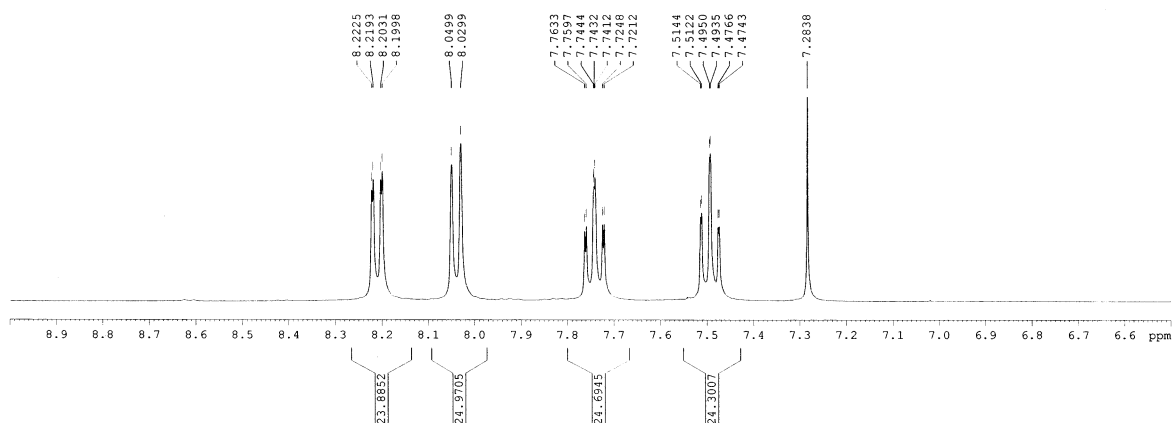

# <sup>13</sup>C spectrum of FN11

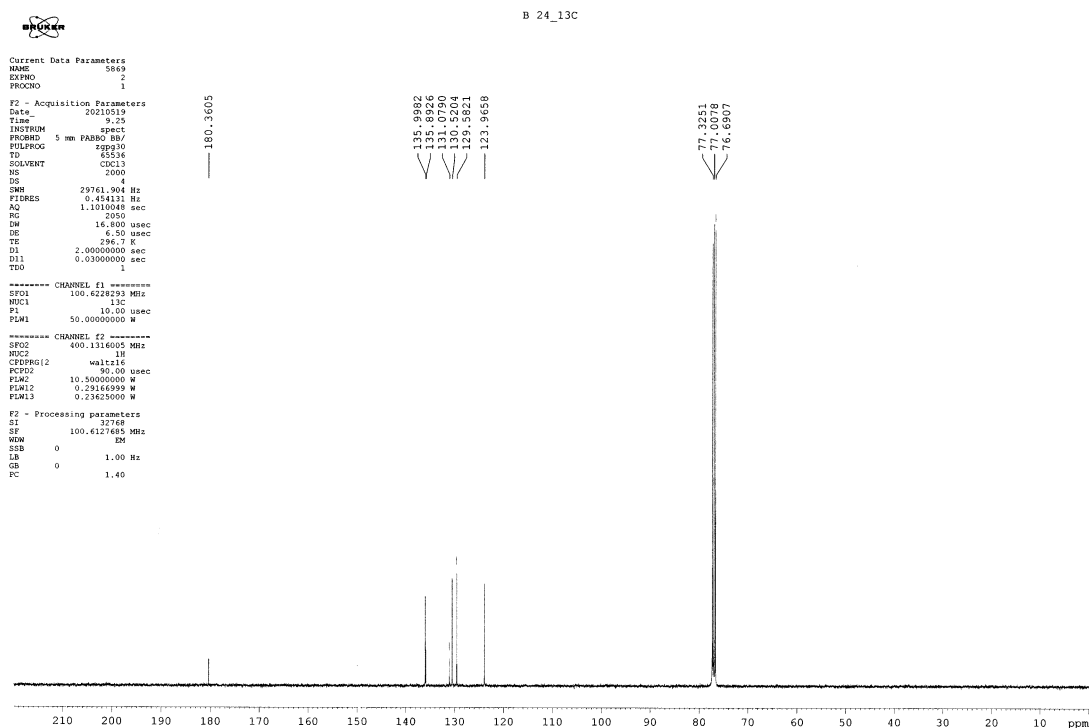

Enlarged spectrum in the range of 110-150 ppm.

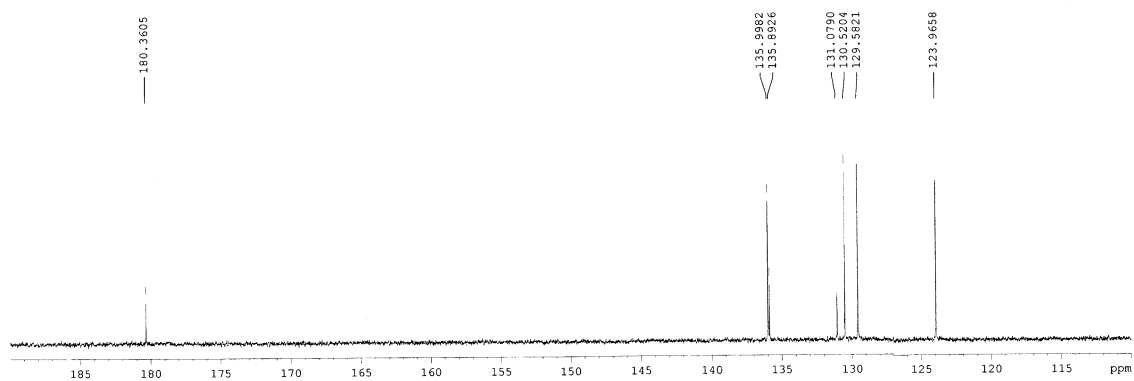

# <sup>1</sup>H spectrum of FN12

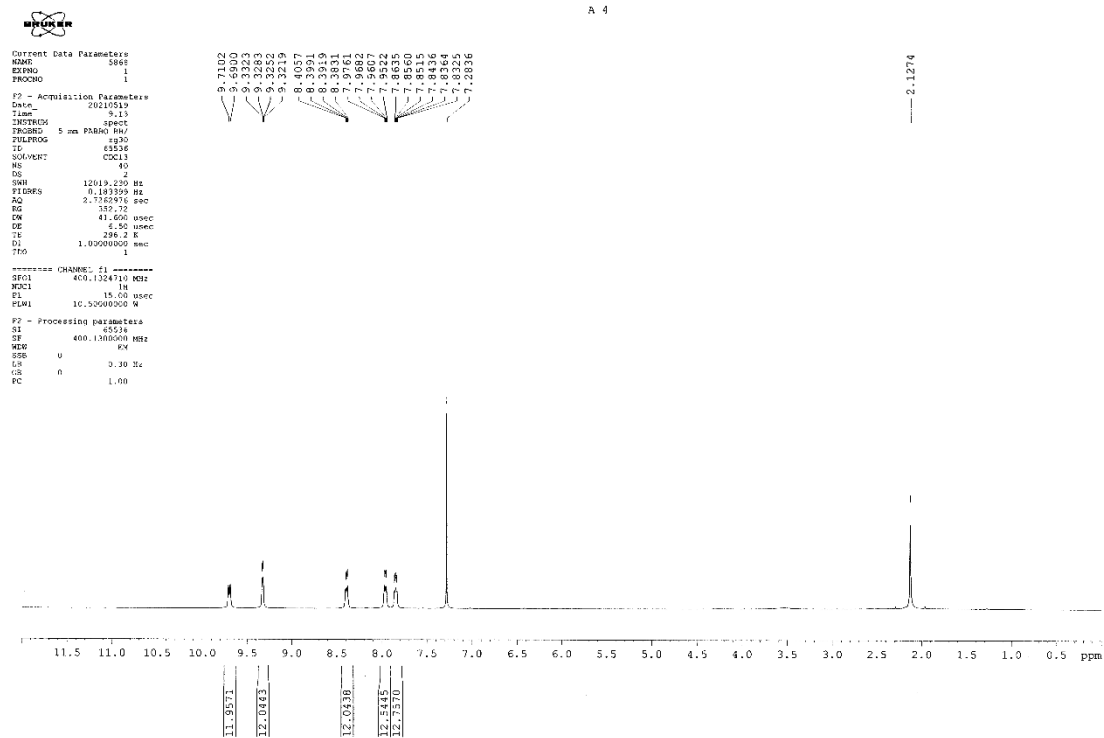

Enlarged spectrum in the range of 6-9 ppm.

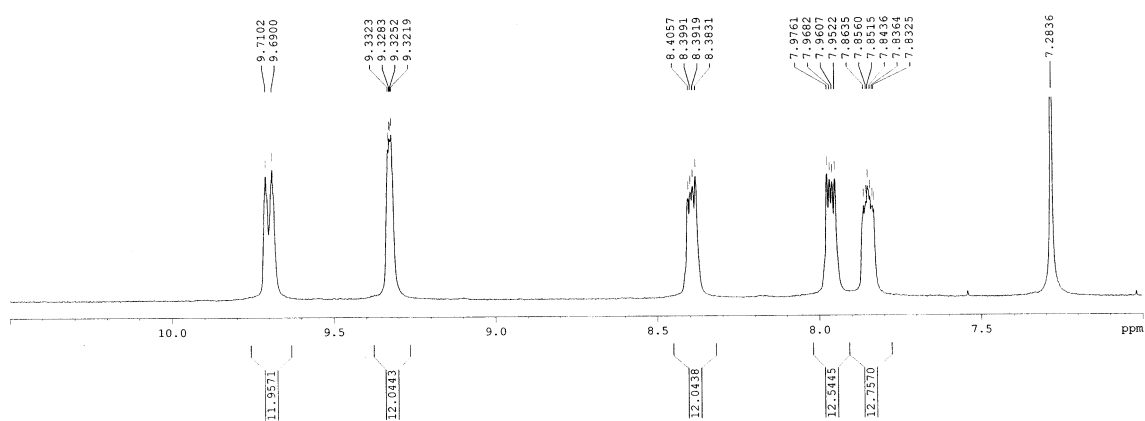

# <sup>13</sup>C spectrum of FN12

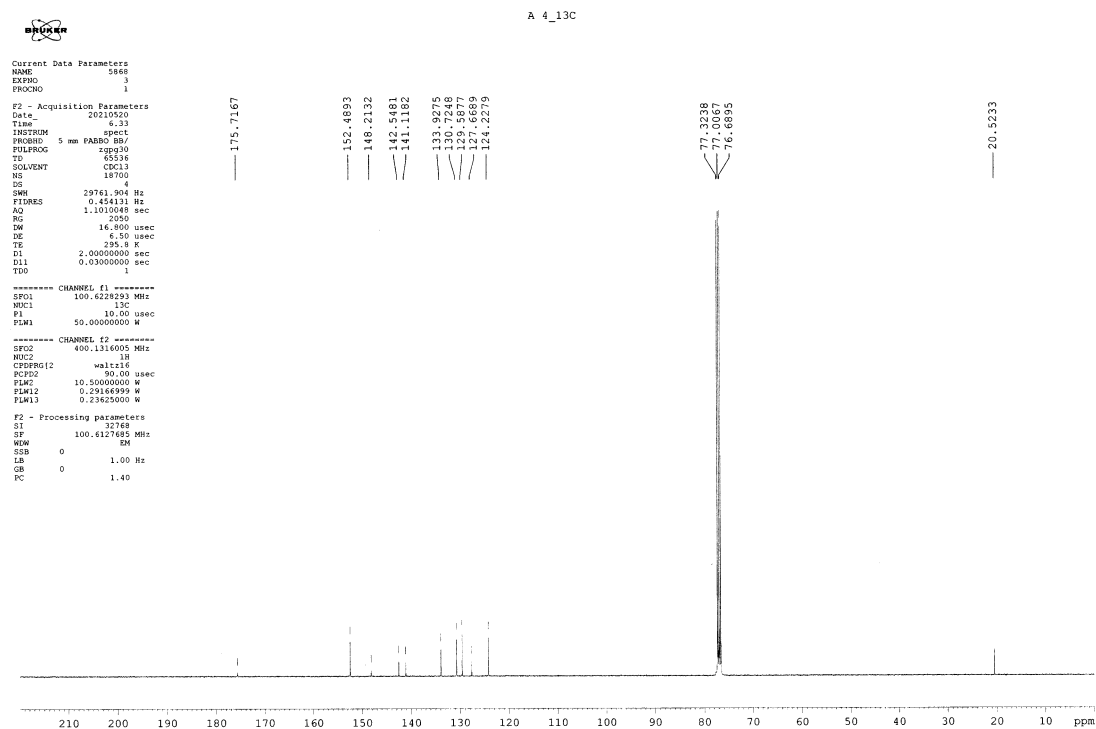

Enlarged spectrum in the range of 100-150 ppm.

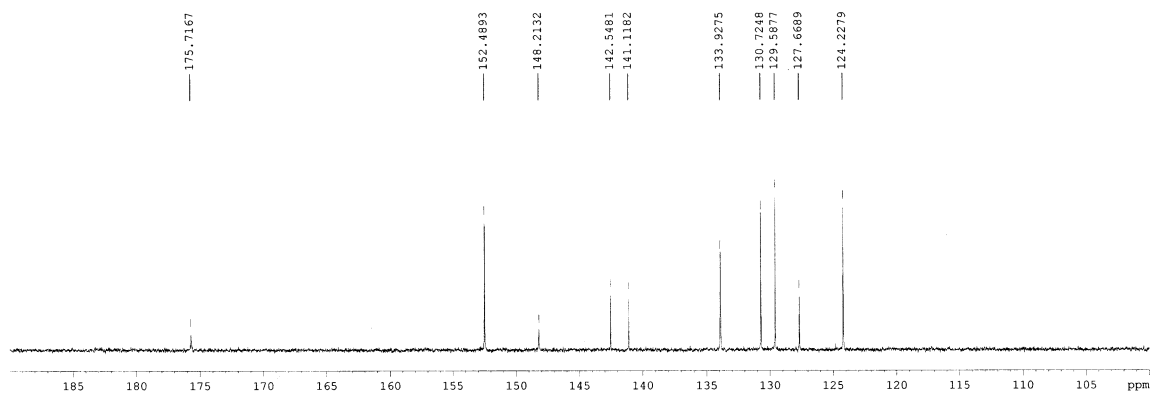

# <sup>1</sup>H spectrum of FN13

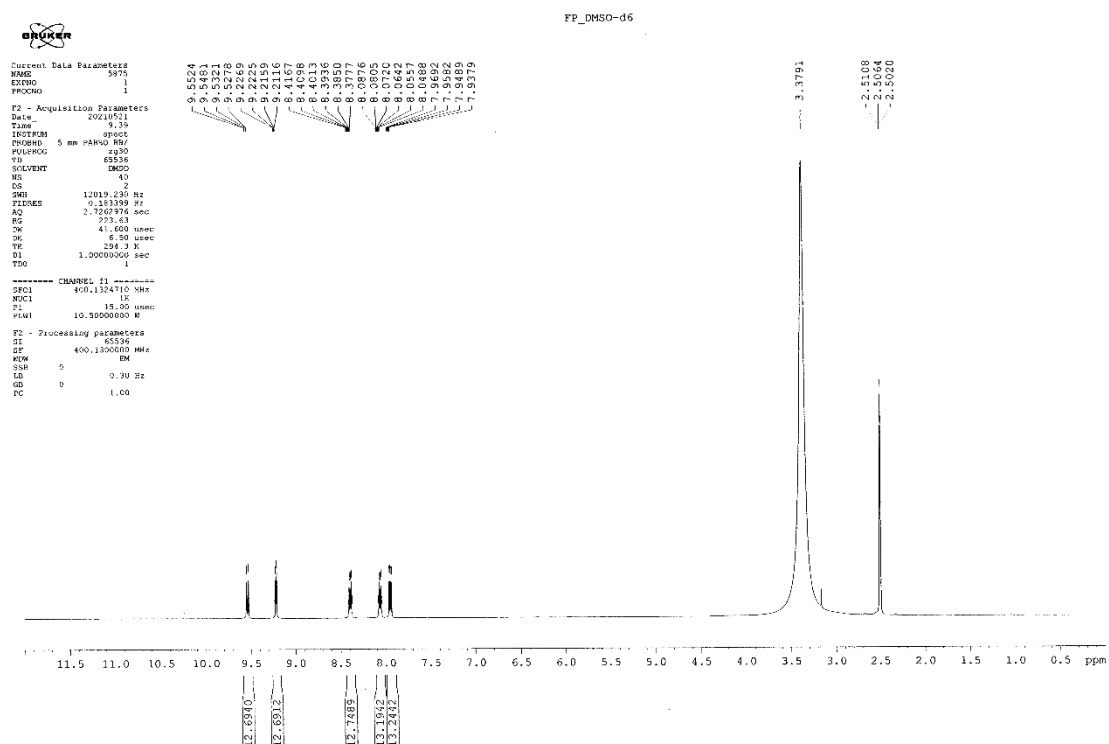

Enlarged spectrum in the range of 100-150 ppm.

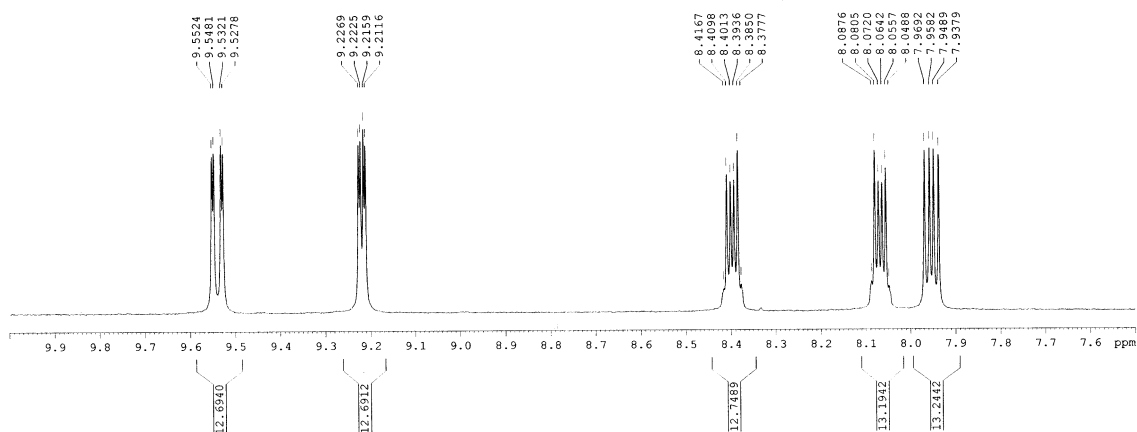

# <sup>13</sup>C spectrum of FN13

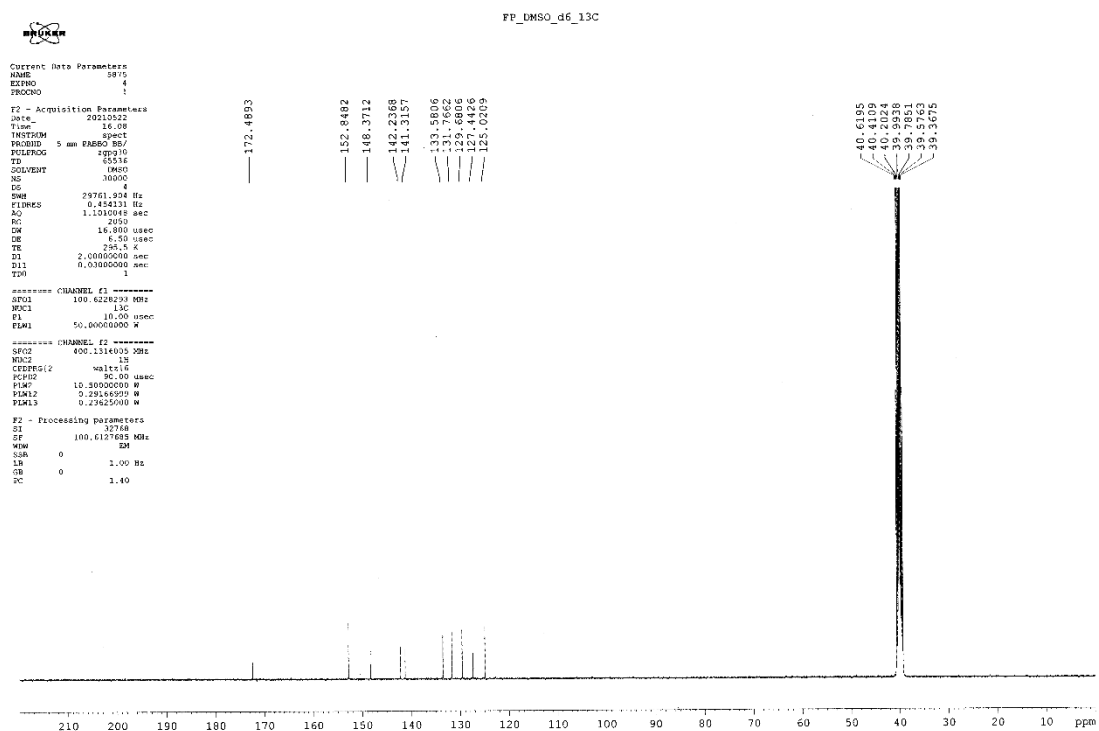



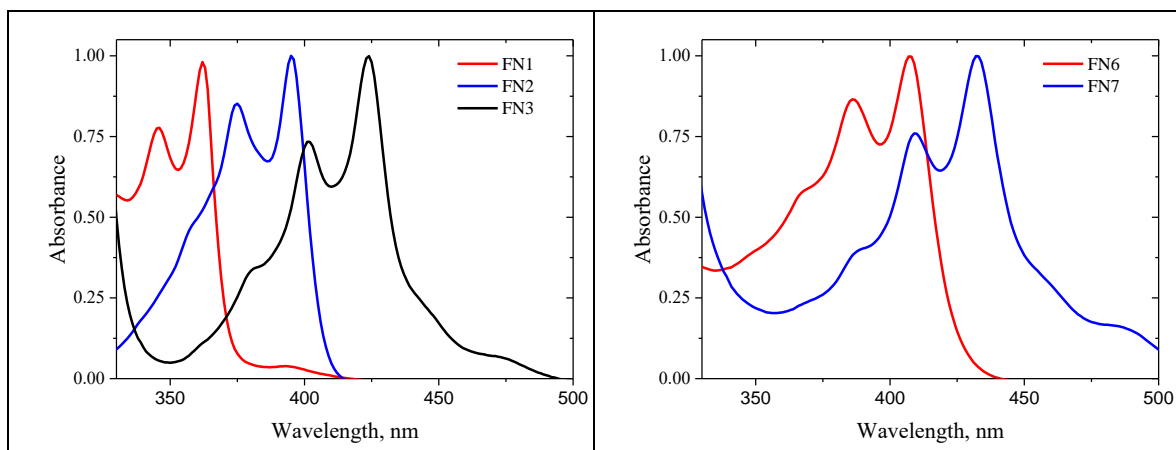

**(A)** the number of conjugated double bonds in the molecule

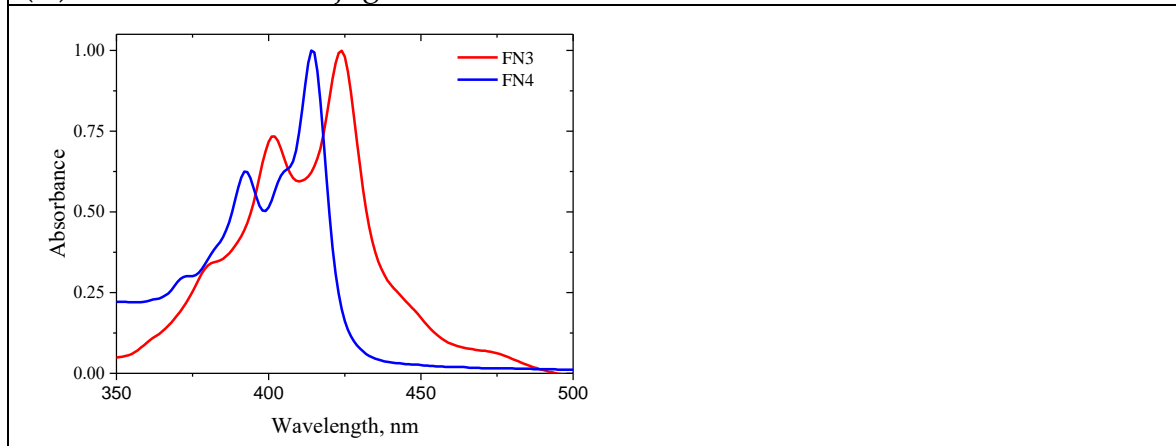

**(B)** angular arrangement of the rings

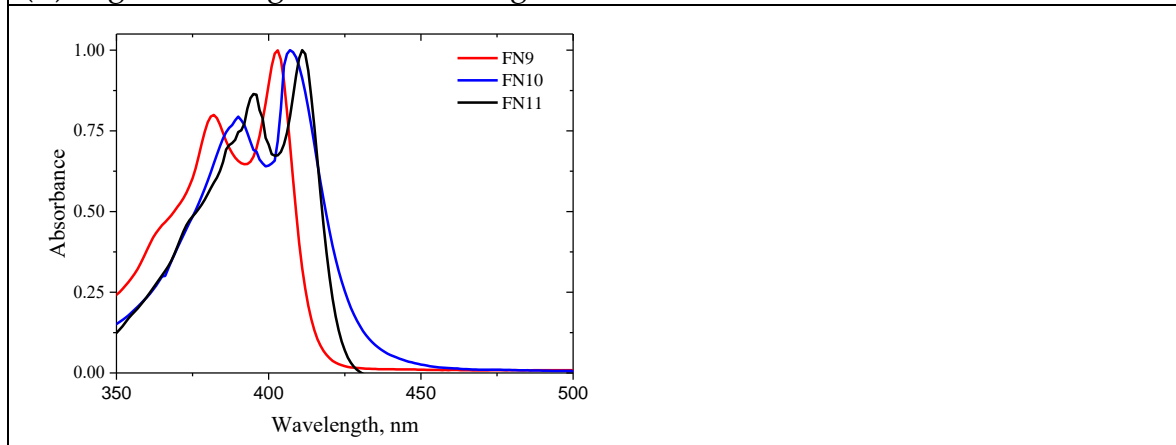

**(C)** increase in the number of nitrogen atoms in the molecule

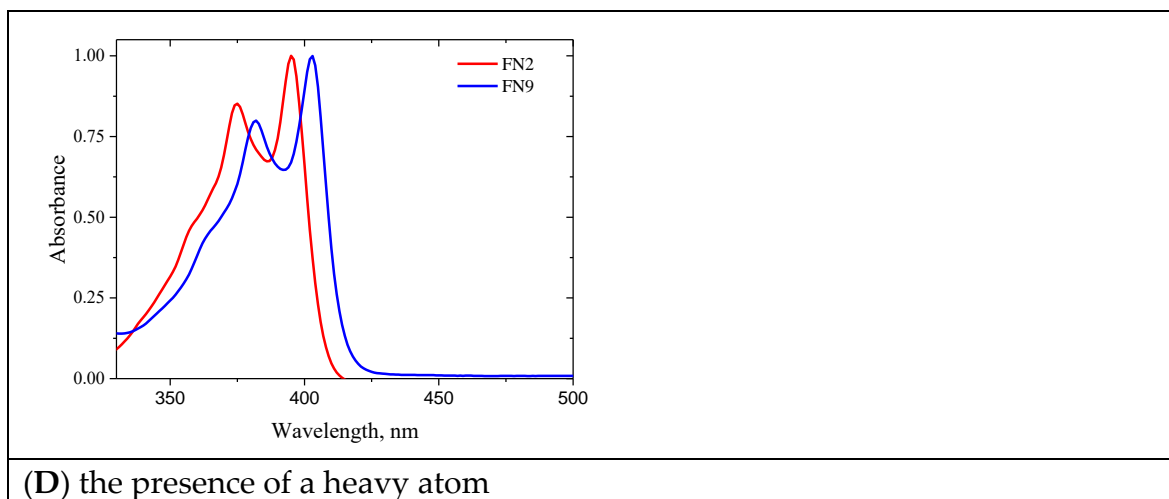

**Figure S1.** Normalized electronic absorption spectra of phenazine derivatives in ethyl acetate illustrating the influence of dye structure on the bands position.

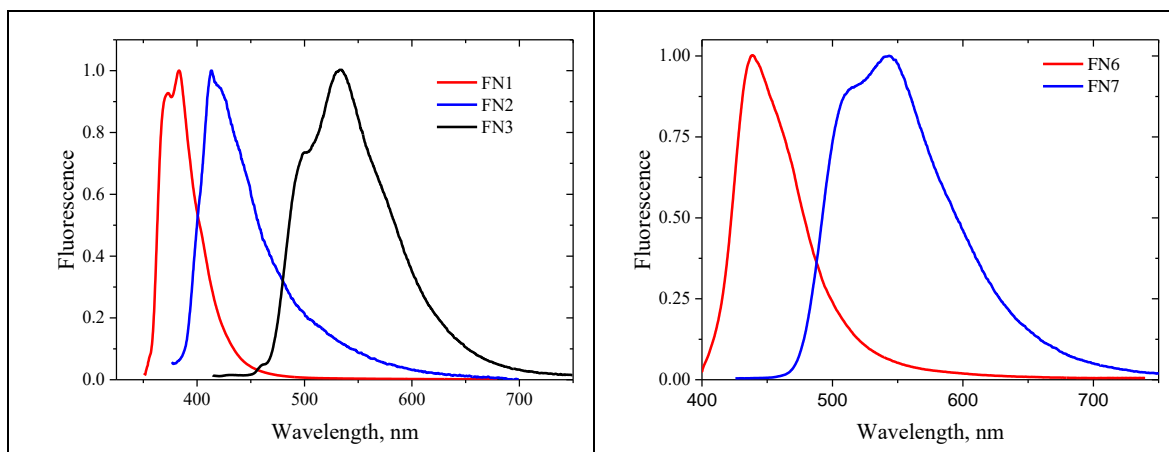

(A) the number of conjugated double bonds in the molecule

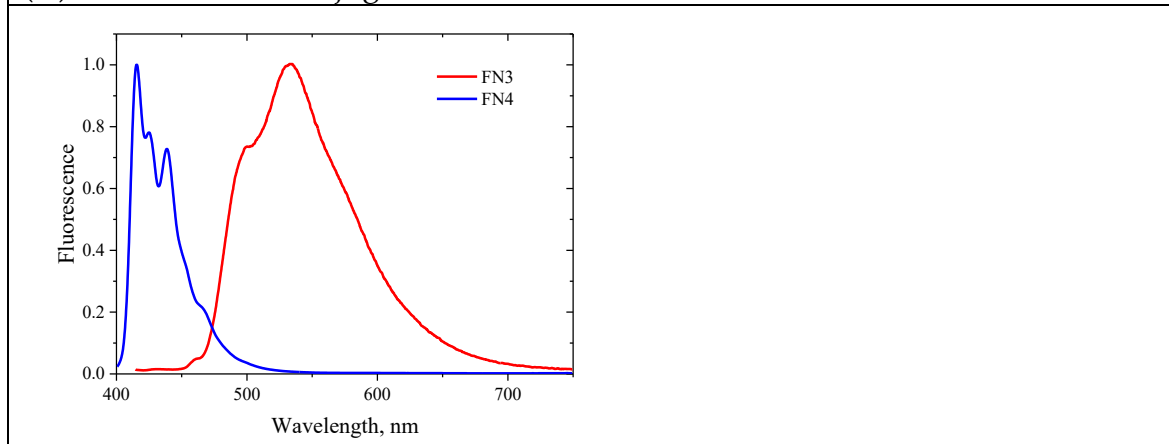

(B) angular arrangement of the rings

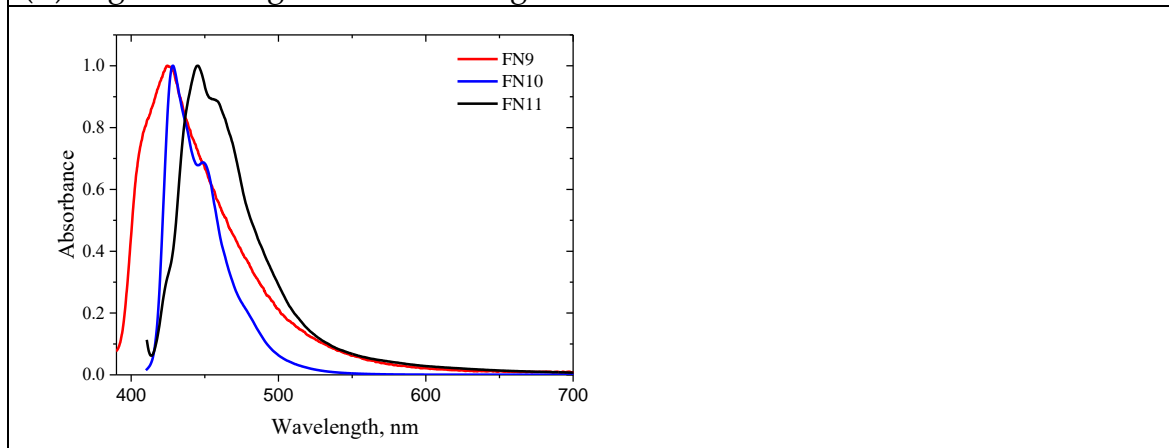

(C) increase in the number of nitrogen atoms in the molecule

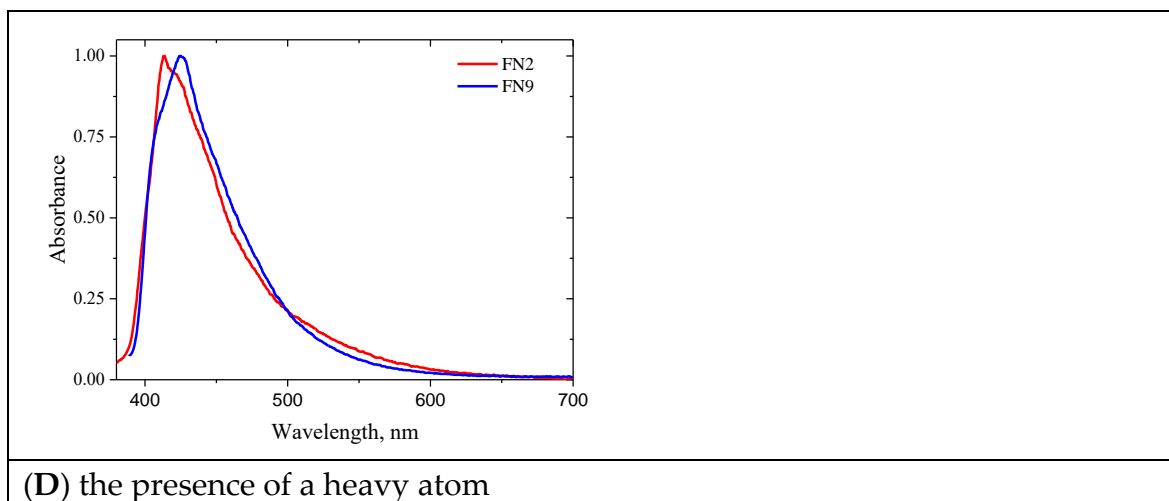

**Figure S2.** Normalized fluorescence spectra of phenazine derivatives in ethyl acetate illustrating the influence of dye structure on the bands position; Ex = 366 nm or 404 nm.

$^1\text{H}$  NMR spectra of a mixture of dibenzo[a.c]phenazine **FN2** (sensitizer) and 2,3-diphenyl-*p*-dioxene in  $\text{CDCl}_3$  after different irradiation time

$^1\text{H}$  NMR spectrum before irradiation.

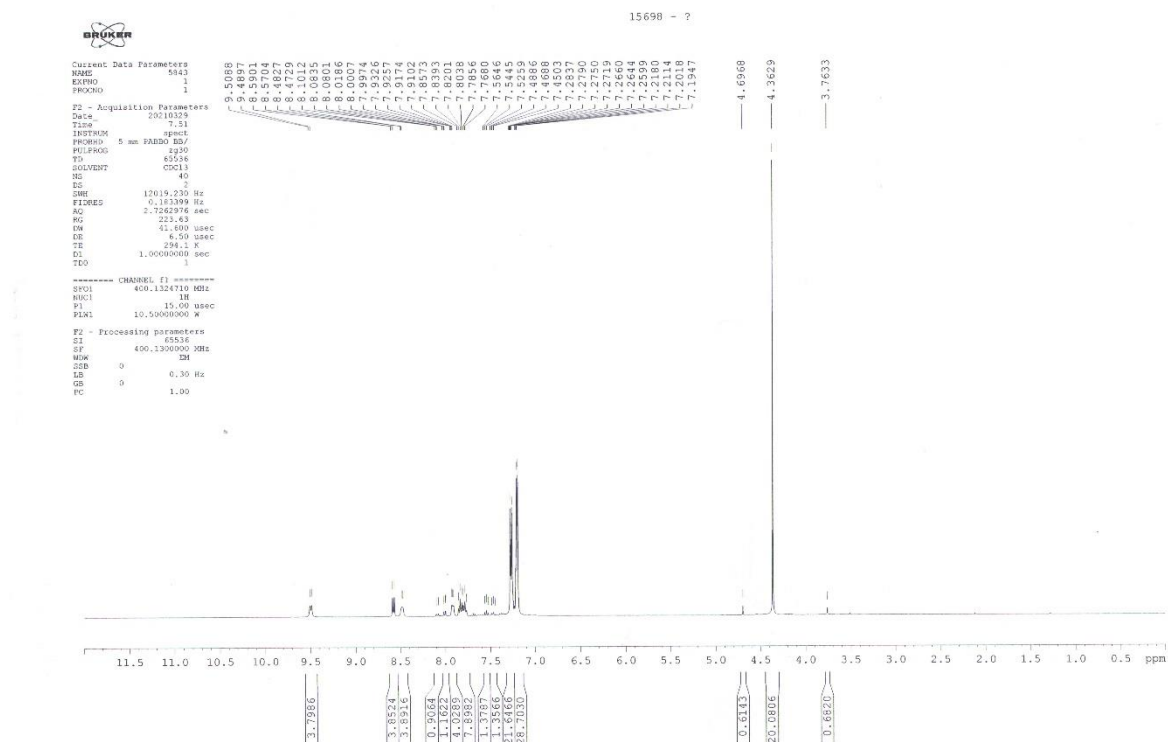

14739

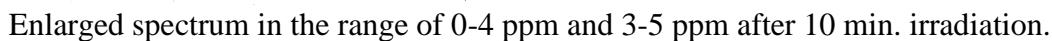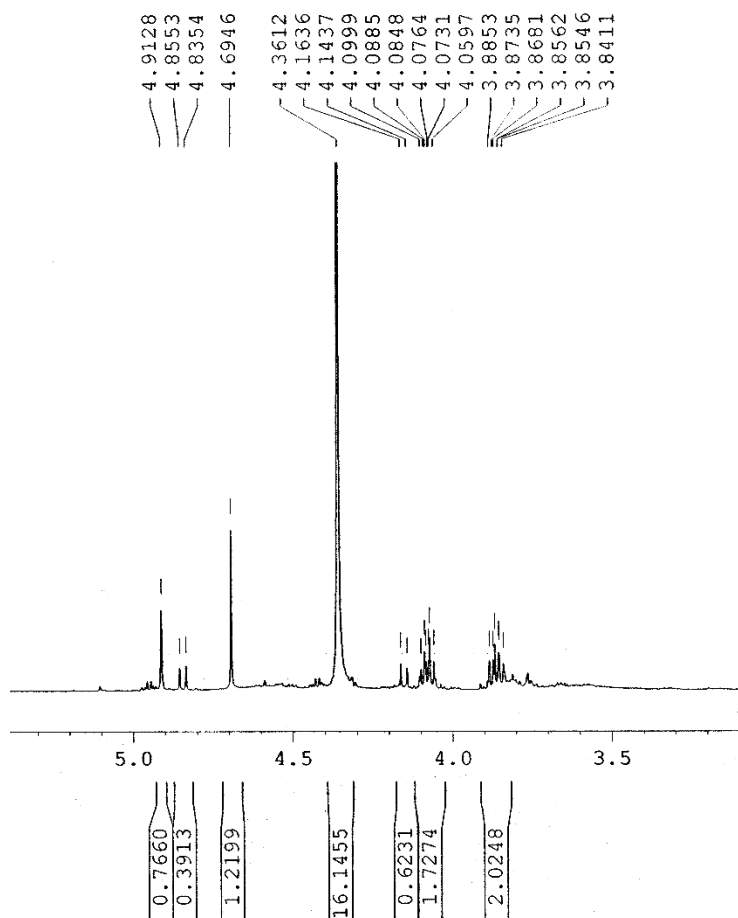

$^1\text{H}$  NMR spectrum after 20 min. irradiation.

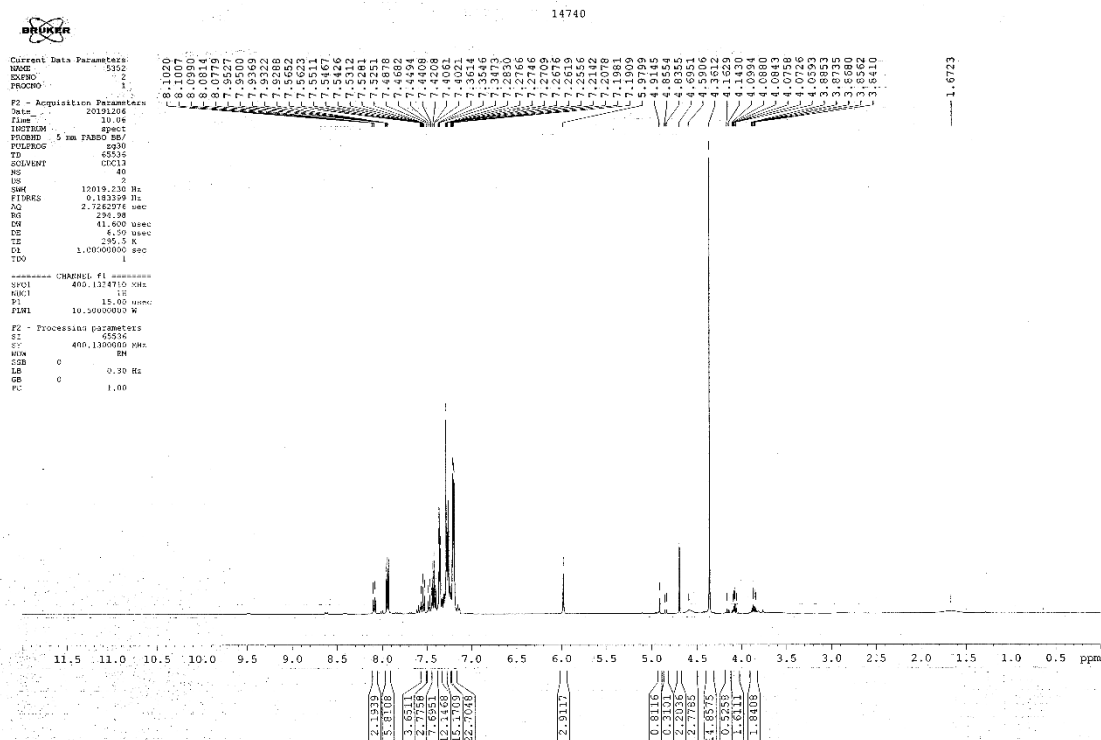

Enlarged spectrum in the range of 0-4 ppm and 3-5 ppm after 20 min. irradiation.

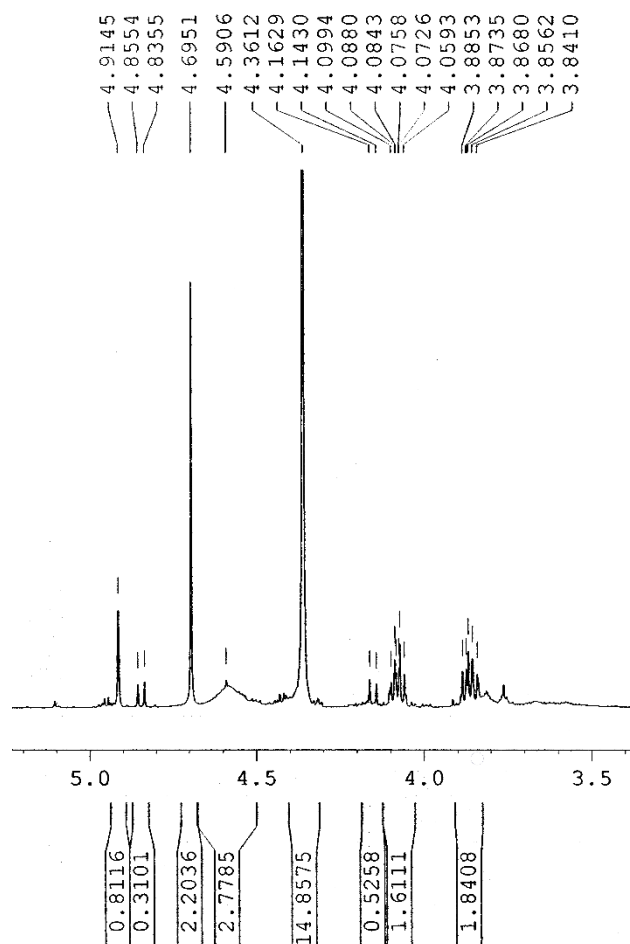

14741

**Current Data Parameters**

NAME 5352  
EXTRNO 3  
PROCNO 3

**F2 - Acquisition Parameters**

Date 20191206  
Time 10.36  
INSTRUM spect  
PROBHD 5 mm PABBO 846  
PULPROG zgpg30  
TD 65536  
FID 65013  
RG 40  
RG 2  
SOLVENT  
NS 2  
DSH 12019.230 Hz  
FIDRES 0.163329 Hz  
AQ 2.7262976 sec  
RG 250.07  
D9 91.600 usec  
PC 6.50 usec  
VC 295.8  
G1 1.0000000 sec  
TEO 1

----- CHANNEL f1 -----  
FQ1 400.1364710 MHz  
NUC1 1H  
P1 19.50 usec  
PL1 10.5000000 dB

**F2 - Processing parameters**

SI 8336  
SF 400.1300000 MHz  
WDW EM  
SSB 0 0.30 Hz  
CB 0 1.30 Hz  
PC 1.00

Integration values (from left to right):

- 3.4308
- 1.5526
- 3.3117
- 3.5912
- 1.1111
- 1.1111
- 1.1471
- 2.8733
- 0.7321
- 3.4956
- 3.7935
- 2.7935
- 12.6815
- 0.5602
- 1.5506
- 1.8461

1.6914

4.9149  
4.8552  
4.8354  
4.6952  
4.5910  
4.5838  
4.3610  
4.1621  
4.1421  
4.1036  
4.0986  
4.0873  
4.0835  
4.0718  
4.0585  
4.0546  
3.8849  
3.8730  
3.8677  
3.8559

0.7932  
0.3488  
3.4956  
2.7935  
12.6815  
0.5602  
1.5506  
1.8461

32
